# Supplementary material for: Secreted antigen A peptidoglycan hydrolase is essential for Enterococcus faecium cell separation and priming of immune checkpoint inhibitor therapy
Source: eLife. 2024 Jun 10;13:RP95297. doi: 10.7554/eLife.95297 (PMC11164530; doi:10.7554/eLife.95297)
Supplement: Figure 1—figure supplement 1—source data 1. [file elife-95297-fig1-figsupp1-data1.xlsx]

## Sheet: Fig 2 suppl 2f
WT	ΔsagA	ΔsagA/psagA
6.33	6.33	7.385
8.44	7.385	7.385
7.385	6.33	9.495
7.385	8.44	7.385
7.385	7.385	7.385
7.385	7.385	7.385
8.44	8.44	6.33
7.385	8.44	10.55
6.33	8.44	7.385
7.385	6.33	8.44
7.385	7.385	6.33
7.385	7.385	6.33
8.44	9.495	6.33
7.385	7.385	8.44
5.275	7.385	7.385
8.44	7.385	8.44
8.44	7.385	8.44
7.385	7.385	8.44
6.33	8.44	7.385
7.385	5.275	9.495
7.385	8.44	8.44
7.385	8.44	7.385
6.33	9.495	7.385
6.33	7.385	6.33
7.385	9.495	7.385
5.275	8.44	7.385
7.385	7.385	6.33
7.385	6.33	7.385
11.605	8.44	7.385
9.495	7.385	5.275
6.33	7.385	6.33
	9.495	6.33
	10.55	7.385
	8.44	8.44
	8.44	7.385
	7.385	7.385
	9.495	7.385
	7.385	9.495
	7.385	8.44
	8.44	7.385
		7.385
		8.44

## Sheet: Fig 2 suppl 2g
WT	ΔsagA	ΔsagA/psagA
13.715	15.825	15.825
17.935	14.77	16.88
12.66	13.715	15.825
14.77	16.88	17.935
14.77	14.77	14.77
15.825	15.825	14.77
14.77	15.825	14.77
15.825	14.77	16.88
13.715	14.77	13.715
14.77	14.77	15.825
13.715	15.825	14.77
13.715	14.77	14.77
16.88	16.88	13.715
15.825	15.825	16.88
12.66	15.825	15.825
15.825	14.77	14.77
16.88	14.77	17.935
14.77	14.77	16.88
12.66	15.825	14.77
15.825	12.66	17.935
13.715	16.88	16.88
15.825	15.825	14.77
13.715	17.935	14.77
14.77	13.715	14.77
13.715	18.99	15.825
10.55	16.88	16.88
14.77	15.825	13.715
13.715	14.77	14.77
18.99	16.88	13.715
15.825	15.825	12.66
14.77	13.715	14.77
	18.99	17.935
	20.045	13.715
	15.825	16.88
	15.825	15.825
	15.825	14.77
	17.935	14.77
	15.825	18.99
	13.715	15.825
	13.715	15.825
		15.825
		15.825
