# Supplementary material for: Secreted antigen A peptidoglycan hydrolase is essential for Enterococcus faecium cell separation and priming of immune checkpoint inhibitor therapy
Source: eLife. 2024 Jun 10;13:RP95297. doi: 10.7554/eLife.95297 (PMC11164530; doi:10.7554/eLife.95297)
Supplement: Figure 1—figure supplement 2—source data 1. [file elife-95297-fig1-figsupp2-data1.xlsx]

## Sheet: WT
Time (Hours)	0 μg/mL			0.00064 μg/mL			0.032 μg/mL			0.16 μg/mL			0.8 μg/mL			4 μg/mL
0	0.121	0.121	0.124	0.121	0.125	0.122	0.12	0.12	0.12	0.121	0.122	0.121	0.12	0.122	0.122	0.119	0.121	0.119
0.5	0.122	0.122	0.125	0.122	0.126	0.122	0.122	0.121	0.122	0.124	0.123	0.122	0.122	0.123	0.123	0.121	0.122	0.121
1	0.145	0.145	0.146	0.144	0.148	0.142	0.144	0.14	0.142	0.146	0.146	0.143	0.142	0.141	0.143	0.132	0.135	0.133
1.5	0.203	0.198	0.205	0.202	0.204	0.2	0.2	0.193	0.194	0.201	0.193	0.191	0.177	0.173	0.181	0.142	0.147	0.142
2	0.323	0.315	0.322	0.321	0.326	0.336	0.314	0.311	0.311	0.312	0.314	0.301	0.199	0.197	0.208	0.146	0.152	0.148
2.5	0.533	0.517	0.531	0.524	0.536	0.53	0.509	0.511	0.519	0.469	0.488	0.46	0.211	0.213	0.226	0.151	0.158	0.153
3	0.781	0.777	0.784	0.856	0.784	0.846	0.773	0.771	0.802	0.7	0.697	0.691	0.226	0.234	0.247	0.157	0.161	0.157
3.5	0.925	0.925	0.937	0.98	0.951	0.992	0.933	0.904	0.957	0.833	0.85	0.827	0.243	0.253	0.262	0.163	0.164	0.161
4	1.056	1.025	1.047	1.079	1.066	1.066	1.026	1.018	1.048	0.935	0.939	0.921	0.259	0.267	0.279	0.165	0.165	0.164
4.5	1.075	1.072	1.083	1.094	1.094	1.108	1.067	1.079	1.079	0.971	0.976	0.961	0.269	0.278	0.293	0.17	0.169	0.166
5	1.078	1.111	1.097	1.103	1.115	1.127	1.085	1.095	1.097	1.002	1.008	0.99	0.278	0.284	0.294	0.171	0.17	0.168
5.5	1.094	1.147	1.119	1.114	1.152	1.149	1.091	1.116	1.124	1.003	1.018	0.994	0.283	0.285	0.308	0.174	0.171	0.169
6	1.141	1.165	1.153	1.14	1.187	1.17	1.109	1.14	1.15	1.018	1.014	0.997	0.274	0.286	0.313	0.173	0.172	0.169
6.5	1.169	1.162	1.144	1.168	1.208	1.184	1.13	1.161	1.171	1.015	1.025	1.005	0.269	0.284	0.28	0.173	0.173	0.17
7	1.186	1.177	1.181	1.169	1.222	1.201	1.149	1.172	1.177	1.009	1.018	1.003	0.391	0.285	0.298	0.174	0.172	0.171
7.5	1.198	1.206	1.194	1.167	1.23	1.208	1.157	1.181	1.184	1.014	1.013	0.999	0.424	0.291	0.331	0.174	0.173	0.171
8	1.212	1.222	1.2	1.187	1.236	1.216	1.164	1.188	1.191	1.016	1.012	0.999	0.429	0.326	0.334	0.173	0.173	0.171
8.5	1.205	1.209	1.201	1.196	1.23	1.213	1.162	1.184	1.19	1.016	1.007	0.99	0.39	0.294	0.298	0.173	0.172	0.171
9	1.212	1.19	1.194	1.203	1.228	1.209	1.167	1.184	1.19	1.017	1.013	0.991	0.371	0.296	0.246	0.173	0.172	0.171
9.5	1.221	1.189	1.203	1.211	1.23	1.21	1.166	1.182	1.188	1.015	1.006	0.989	0.357	0.274	0.241	0.172	0.172	0.171
10	1.223	1.194	1.208	1.212	1.231	1.208	1.17	1.179	1.188	1.011	1.003	0.988	0.366	0.282	0.232	0.172	0.171	0.17
10.5	1.221	1.203	1.201	1.208	1.232	1.212	1.165	1.175	1.189	1.009	1	0.986	0.331	0.323	0.224	0.172	0.17	0.17
11	1.224	1.208	1.196	1.212	1.231	1.204	1.171	1.177	1.184	1.012	0.998	0.983	0.319	0.241	0.222	0.172	0.169	0.169
11.5	1.23	1.217	1.204	1.212	1.234	1.206	1.173	1.173	1.185	1.01	0.998	0.983	0.335	0.267	0.215	0.17	0.168	0.168
12	1.224	1.215	1.196	1.217	1.237	1.202	1.176	1.17	1.175	1.004	1	0.98	0.304	0.221	0.21	0.171	0.167	0.167
12.5	1.222	1.222	1.208	1.213	1.241	1.204	1.18	1.169	1.178	1.013	0.998	0.981	0.33	0.215	0.207	0.169	0.166	0.166
13	1.22	1.225	1.213	1.223	1.234	1.199	1.186	1.172	1.172	1.012	0.995	0.982	0.284	0.226	0.203	0.169	0.165	0.165
13.5	1.252	1.232	1.244	1.231	1.227	1.201	1.2	1.181	1.173	1.011	0.999	0.982	0.276	0.213	0.325	0.167	0.164	0.164
14	1.248	1.227	1.239	1.226	1.217	1.201	1.196	1.178	1.169	1.014	0.998	0.981	0.272	0.216	0.312	0.169	0.163	0.164
14.5	1.275	1.246	1.262	1.246	1.221	1.211	1.209	1.177	1.178	1.015	0.999	0.984	0.262	0.216	0.302	0.168	0.162	0.163
15	1.269	1.224	1.245	1.237	1.204	1.193	1.194	1.167	1.167	1.007	0.997	0.982	0.257	0.203	0.295	0.167	0.161	0.162

## Sheet: WT - Empty Vector
Time (Hours)	0 μg/mL			0.00064 μg/mL			0.032 μg/mL			0.16 μg/mL			0.8 μg/mL			4 μg/mL
0	0.117	0.117	0.117	0.117	0.118	0.118	0.115	0.116	0.118	0.115	0.114	0.117	0.117	0.115	0.117	0.115	0.116	0.117
0.5	0.117	0.118	0.118	0.119	0.118	0.118	0.116	0.117	0.119	0.117	0.115	0.117	0.118	0.116	0.118	0.117	0.118	0.117
1	0.133	0.133	0.133	0.133	0.133	0.133	0.131	0.131	0.133	0.13	0.129	0.13	0.132	0.129	0.132	0.128	0.129	0.128
1.5	0.172	0.164	0.171	0.173	0.173	0.173	0.171	0.17	0.173	0.169	0.168	0.168	0.174	0.167	0.172	0.15	0.149	0.149
2	0.269	0.262	0.255	0.262	0.273	0.268	0.254	0.263	0.26	0.26	0.262	0.261	0.25	0.245	0.261	0.16	0.16	0.161
2.5	0.485	0.426	0.41	0.421	0.451	0.45	0.394	0.412	0.418	0.419	0.428	0.427	0.397	0.382	0.407	0.163	0.164	0.158
3	0.689	0.711	0.619	0.639	0.669	0.643	0.648	0.624	0.646	0.629	0.654	0.637	0.585	0.573	0.596	0.165	0.164	0.167
3.5	0.844	0.847	0.767	0.777	0.802	0.794	0.796	0.781	0.801	0.774	0.814	0.798	0.738	0.724	0.747	0.181	0.173	0.166
4	0.908	0.915	0.848	0.877	0.913	0.915	0.91	0.866	0.885	0.86	0.887	0.89	0.809	0.786	0.819	0.174	0.162	0.166
4.5	0.947	0.964	0.904	0.928	0.965	0.97	0.956	0.927	0.942	0.914	0.929	0.939	0.833	0.833	0.851	0.198	0.187	0.164
5	0.948	0.973	0.917	0.946	0.978	0.985	0.964	0.946	0.955	0.927	0.941	0.962	0.851	0.844	0.865	0.203	0.167	0.163
5.5	0.957	0.969	0.919	0.956	0.99	0.994	0.965	0.952	0.955	0.924	0.944	0.958	0.841	0.844	0.862	0.212	0.177	0.162
6	0.971	0.98	0.934	0.971	1	1.007	0.961	0.966	0.968	0.927	0.933	0.949	0.838	0.84	0.858	0.222	0.157	0.16
6.5	0.966	0.976	0.956	0.985	1.008	1.018	0.971	0.982	0.985	0.938	0.948	0.968	0.847	0.84	0.862	0.197	0.157	0.16
7	0.981	0.982	0.975	1.005	1.008	1.021	0.982	1.01	1.001	0.94	0.939	0.978	0.831	0.837	0.853	0.211	0.158	0.16
7.5	0.987	0.989	0.978	1.013	1.025	1.041	1.001	1.022	1.012	0.942	0.951	0.984	0.827	0.834	0.849	0.195	0.167	0.162
8	1.006	0.998	0.995	1.02	1.037	1.041	1.003	1.04	1.017	0.948	0.962	0.992	0.824	0.836	0.849	0.199	0.146	0.163
8.5	1.01	1.008	1.006	1.016	1.052	1.052	0.999	1.033	1.018	0.945	0.967	0.996	0.82	0.833	0.844	0.203	0.147	0.169
9	1.005	1.02	1.024	1.012	1.05	1.052	1.001	1.023	1.016	0.948	0.972	0.988	0.822	0.832	0.845	0.194	0.149	0.164
9.5	1	1.019	1.023	1	1.049	1.054	0.987	1.011	1.023	0.944	0.978	0.996	0.82	0.83	0.841	0.186	0.142	0.158
10	1.015	1.043	1.049	1.013	1.062	1.056	0.986	1.016	1.023	0.949	0.986	1	0.818	0.83	0.84	0.196	0.151	0.177
10.5	1.025	1.03	1.039	1.031	1.059	1.055	0.994	1.034	1.031	0.966	0.985	1.011	0.816	0.828	0.841	0.174	0.142	0.216
11	1.021	1.045	1.043	1.026	1.063	1.06	0.99	1.032	1.031	0.97	0.99	1.013	0.818	0.828	0.844	0.189	0.147	0.267
11.5	1.031	1.044	1.067	1.026	1.062	1.058	0.988	1.036	1.03	0.972	0.992	1.016	0.816	0.827	0.846	0.188	0.142	0.234
12	1.021	1.045	1.055	1.027	1.059	1.065	0.996	1.035	1.019	0.97	0.992	1.019	0.815	0.826	0.843	0.179	0.141	0.144
12.5	1.026	1.047	1.071	1.024	1.058	1.064	1.002	1.04	1.021	0.977	0.995	1.019	0.817	0.826	0.843	0.211	0.139	0.146
13	1.024	1.05	1.058	1.02	1.054	1.06	1.001	1.039	1.017	0.973	0.996	1.017	0.818	0.825	0.841	0.167	0.142	0.146
13.5	1.024	1.08	1.095	1.03	1.052	1.061	1.019	1.055	1.025	0.981	1.002	1.021	0.816	0.826	0.847	0.179	0.171	0.149
14	1.023	1.071	1.079	1.023	1.045	1.053	1.017	1.05	1.022	0.979	1.005	1.021	0.816	0.826	0.84	0.199	0.138	0.153
14.5	1.035	1.075	1.104	1.027	1.052	1.055	1.028	1.056	1.014	0.989	1.012	1.03	0.818	0.827	0.845	0.17	0.137	0.222
15	1.028	1.063	1.11	1.014	1.044	1.051	1.021	1.055	1.014	0.983	1.009	1.031	0.814	0.828	0.84	0.187	0.137	0.145

## Sheet: ΔsagA
Time (Hours)	0 μg/mL			0.00064 μg/mL			0.032 μg/mL			0.16 μg/mL			0.8 μg/mL			4 μg/mL
0	0.11	0.11	0.112	0.11	0.113	0.113	0.111	0.11	0.11	0.111	0.11	0.112	0.111	0.109	0.113	0.108	0.108	0.109
0.5	0.11	0.111	0.113	0.111	0.114	0.112	0.112	0.111	0.111	0.111	0.111	0.112	0.111	0.109	0.114	0.109	0.108	0.11
1	0.114	0.113	0.115	0.114	0.117	0.118	0.116	0.112	0.115	0.115	0.115	0.115	0.114	0.112	0.117	0.111	0.11	0.112
1.5	0.118	0.118	0.119	0.118	0.122	0.122	0.119	0.115	0.118	0.119	0.117	0.117	0.117	0.115	0.12	0.113	0.112	0.113
2	0.123	0.122	0.124	0.123	0.126	0.126	0.122	0.117	0.121	0.121	0.119	0.119	0.118	0.116	0.121	0.113	0.113	0.114
2.5	0.129	0.127	0.13	0.127	0.131	0.132	0.124	0.12	0.124	0.123	0.121	0.12	0.119	0.117	0.122	0.114	0.114	0.115
3	0.138	0.137	0.136	0.134	0.14	0.141	0.126	0.122	0.128	0.125	0.123	0.121	0.12	0.118	0.123	0.115	0.115	0.115
3.5	0.15	0.148	0.148	0.144	0.153	0.153	0.129	0.126	0.133	0.126	0.124	0.123	0.121	0.119	0.123	0.116	0.116	0.116
4	0.167	0.165	0.165	0.161	0.17	0.173	0.135	0.129	0.139	0.128	0.127	0.123	0.122	0.12	0.124	0.116	0.116	0.117
4.5	0.193	0.191	0.214	0.182	0.194	0.203	0.14	0.135	0.147	0.13	0.128	0.124	0.123	0.121	0.124	0.117	0.118	0.118
5	0.23	0.223	0.223	0.215	0.232	0.242	0.147	0.142	0.157	0.131	0.129	0.125	0.123	0.121	0.14	0.119	0.119	0.119
5.5	0.279	0.271	0.271	0.26	0.286	0.298	0.157	0.151	0.17	0.133	0.131	0.126	0.123	0.123	0.125	0.119	0.12	0.119
6	0.344	0.346	0.333	0.323	0.354	0.374	0.169	0.163	0.185	0.134	0.133	0.127	0.123	0.123	0.126	0.12	0.121	0.12
6.5	0.419	0.404	0.406	0.398	0.433	0.453	0.184	0.177	0.206	0.136	0.134	0.133	0.123	0.123	0.126	0.12	0.121	0.12
7	0.495	0.483	0.488	0.478	0.515	0.54	0.204	0.195	0.232	0.137	0.136	0.131	0.123	0.124	0.126	0.121	0.123	0.121
7.5	0.562	0.549	0.56	0.549	0.585	0.607	0.227	0.217	0.264	0.14	0.139	0.132	0.123	0.124	0.124	0.122	0.124	0.122
8	0.614	0.598	0.614	0.601	0.636	0.656	0.255	0.244	0.299	0.141	0.141	0.134	0.123	0.125	0.135	0.124	0.126	0.123
8.5	0.658	0.638	0.658	0.645	0.682	0.702	0.287	0.275	0.341	0.143	0.143	0.136	0.122	0.125	0.123	0.124	0.126	0.123
9	0.701	0.675	0.696	0.683	0.719	0.742	0.322	0.31	0.385	0.145	0.145	0.137	0.122	0.125	0.128	0.124	0.126	0.123
9.5	0.733	0.709	0.726	0.712	0.748	0.774	0.365	0.346	0.43	0.147	0.147	0.14	0.122	0.125	0.124	0.124	0.126	0.124
10	0.757	0.732	0.751	0.733	0.77	0.796	0.402	0.384	0.474	0.149	0.149	0.143	0.122	0.123	0.122	0.124	0.126	0.124
10.5	0.776	0.749	0.769	0.748	0.785	0.81	0.437	0.419	0.51	0.151	0.151	0.145	0.122	0.122	0.122	0.124	0.127	0.124
11	0.788	0.762	0.786	0.763	0.796	0.822	0.461	0.444	0.536	0.153	0.154	0.149	0.121	0.122	0.122	0.124	0.127	0.124
11.5	0.797	0.773	0.795	0.769	0.806	0.829	0.481	0.466	0.557	0.156	0.156	0.151	0.121	0.122	0.121	0.124	0.127	0.124
12	0.807	0.783	0.803	0.775	0.813	0.835	0.498	0.482	0.575	0.158	0.159	0.155	0.121	0.122	0.121	0.124	0.126	0.124
12.5	0.813	0.787	0.809	0.781	0.817	0.841	0.51	0.495	0.589	0.161	0.162	0.158	0.121	0.122	0.121	0.124	0.126	0.124
13	0.818	0.793	0.815	0.786	0.824	0.845	0.522	0.507	0.602	0.164	0.164	0.161	0.121	0.121	0.121	0.124	0.126	0.125
13.5	0.821	0.797	0.819	0.79	0.827	0.85	0.533	0.516	0.611	0.166	0.167	0.163	0.12	0.119	0.12	0.124	0.127	0.125
14	0.823	0.8	0.822	0.793	0.831	0.853	0.54	0.523	0.616	0.169	0.17	0.167	0.121	0.118	0.12	0.124	0.127	0.125
14.5	0.825	0.802	0.825	0.796	0.833	0.856	0.544	0.528	0.619	0.172	0.173	0.17	0.12	0.118	0.12	0.124	0.127	0.125
15	0.827	0.805	0.829	0.797	0.836	0.858	0.545	0.527	0.62	0.175	0.176	0.173	0.12	0.118	0.12	0.124	0.127	0.125

## Sheet: ΔsagA - Empty Vector
Time (Hours)	0 μg/mL			0.00064 μg/mL			0.032 μg/mL			0.16 μg/mL			0.8 μg/mL			4 μg/mL
0	0.108	0.108	0.11	0.107	0.107	0.109	0.108	0.108	0.108	0.108	0.108	0.108	0.111	0.108	0.112	0.108	0.116	0.107
0.5	0.108	0.108	0.111	0.107	0.108	0.109	0.107	0.108	0.108	0.109	0.108	0.108	0.107	0.108	0.109	0.108	0.108	0.107
1	0.111	0.111	0.113	0.11	0.109	0.11	0.11	0.11	0.109	0.111	0.11	0.11	0.109	0.109	0.111	0.109	0.109	0.108
1.5	0.113	0.113	0.115	0.112	0.112	0.112	0.112	0.112	0.111	0.113	0.111	0.112	0.11	0.11	0.113	0.109	0.109	0.109
2	0.114	0.115	0.117	0.115	0.113	0.114	0.114	0.113	0.113	0.114	0.112	0.113	0.11	0.111	0.113	0.11	0.11	0.11
2.5	0.117	0.118	0.119	0.118	0.117	0.117	0.117	0.116	0.115	0.117	0.113	0.114	0.11	0.111	0.114	0.11	0.11	0.109
3	0.121	0.122	0.124	0.123	0.121	0.119	0.121	0.118	0.118	0.118	0.114	0.116	0.11	0.111	0.115	0.111	0.11	0.11
3.5	0.126	0.128	0.13	0.13	0.127	0.125	0.125	0.123	0.123	0.12	0.116	0.118	0.11	0.112	0.116	0.112	0.111	0.11
4	0.135	0.137	0.138	0.141	0.136	0.131	0.133	0.129	0.128	0.126	0.116	0.12	0.11	0.112	0.116	0.112	0.11	0.11
4.5	0.148	0.148	0.149	0.157	0.149	0.142	0.141	0.137	0.136	0.128	0.118	0.122	0.11	0.112	0.117	0.113	0.111	0.11
5	0.165	0.166	0.168	0.18	0.169	0.158	0.154	0.148	0.147	0.13	0.12	0.125	0.113	0.112	0.117	0.113	0.111	0.11
5.5	0.194	0.193	0.193	0.213	0.197	0.181	0.172	0.165	0.161	0.133	0.121	0.127	0.11	0.112	0.118	0.114	0.111	0.11
6	0.233	0.23	0.228	0.26	0.237	0.215	0.196	0.187	0.182	0.135	0.123	0.129	0.116	0.112	0.118	0.114	0.112	0.111
6.5	0.286	0.281	0.276	0.324	0.294	0.263	0.227	0.218	0.209	0.138	0.125	0.131	0.11	0.112	0.118	0.114	0.112	0.111
7	0.354	0.351	0.339	0.403	0.364	0.324	0.272	0.259	0.248	0.141	0.127	0.134	0.11	0.112	0.118	0.115	0.112	0.112
7.5	0.433	0.431	0.411	0.49	0.447	0.397	0.326	0.311	0.297	0.145	0.129	0.136	0.11	0.112	0.118	0.116	0.112	0.113
8	0.514	0.515	0.484	0.569	0.531	0.476	0.387	0.373	0.358	0.148	0.131	0.14	0.11	0.112	0.119	0.116	0.113	0.114
8.5	0.579	0.588	0.541	0.63	0.595	0.546	0.454	0.442	0.425	0.152	0.134	0.142	0.11	0.112	0.119	0.117	0.113	0.116
9	0.619	0.634	0.576	0.668	0.635	0.594	0.518	0.508	0.492	0.155	0.136	0.145	0.11	0.112	0.119	0.117	0.113	0.117
9.5	0.641	0.66	0.597	0.687	0.656	0.622	0.564	0.556	0.546	0.159	0.139	0.148	0.11	0.112	0.119	0.117	0.113	0.117
10	0.655	0.676	0.607	0.704	0.672	0.639	0.594	0.587	0.577	0.164	0.142	0.153	0.11	0.112	0.119	0.117	0.113	0.118
10.5	0.667	0.689	0.617	0.715	0.683	0.653	0.609	0.603	0.595	0.17	0.146	0.157	0.11	0.112	0.119	0.117	0.113	0.118
11	0.677	0.701	0.625	0.725	0.695	0.663	0.619	0.615	0.607	0.175	0.149	0.162	0.11	0.112	0.119	0.117	0.113	0.118
11.5	0.686	0.71	0.633	0.732	0.701	0.674	0.628	0.623	0.617	0.18	0.154	0.168	0.114	0.112	0.119	0.118	0.113	0.119
12	0.688	0.714	0.639	0.737	0.708	0.68	0.635	0.631	0.624	0.187	0.158	0.173	0.11	0.112	0.119	0.117	0.113	0.119
12.5	0.693	0.719	0.642	0.741	0.712	0.685	0.641	0.638	0.633	0.194	0.163	0.18	0.11	0.112	0.119	0.117	0.113	0.119
13	0.692	0.72	0.645	0.742	0.714	0.688	0.646	0.644	0.637	0.201	0.168	0.187	0.11	0.112	0.119	0.117	0.113	0.119
13.5	0.691	0.722	0.646	0.743	0.714	0.689	0.649	0.646	0.643	0.209	0.174	0.195	0.111	0.112	0.119	0.118	0.113	0.122
14	0.691	0.721	0.646	0.743	0.715	0.691	0.651	0.65	0.644	0.218	0.181	0.204	0.111	0.112	0.119	0.118	0.113	0.122
14.5	0.69	0.721	0.646	0.742	0.715	0.692	0.651	0.648	0.644	0.228	0.188	0.213	0.111	0.111	0.118	0.118	0.113	0.125
15	0.69	0.721	0.645	0.742	0.716	0.692	0.65	0.65	0.645	0.237	0.195	0.224	0.11	0.111	0.118	0.118	0.113	0.126

## Sheet: ΔsagA - psgaA
Time (Hours)	0 μg/mL			0.00064 μg/mL			0.032 μg/mL			0.16 μg/mL			0.8 μg/mL			4 μg/mL
0	0.122	0.123	0.122	0.115	0.116	0.116	0.115	0.116	0.123	0.116	0.116	0.116	0.116	0.117	0.118	0.116	0.116	0.118
0.5	0.123	0.124	0.123	0.116	0.116	0.116	0.115	0.116	0.123	0.116	0.116	0.116	0.116	0.117	0.118	0.115	0.116	0.118
1	0.126	0.128	0.127	0.121	0.121	0.121	0.119	0.12	0.127	0.121	0.12	0.119	0.119	0.121	0.123	0.118	0.119	0.12
1.5	0.135	0.138	0.137	0.133	0.136	0.135	0.131	0.132	0.138	0.134	0.132	0.132	0.13	0.131	0.133	0.122	0.123	0.124
2	0.154	0.157	0.158	0.163	0.171	0.167	0.157	0.161	0.167	0.163	0.165	0.159	0.147	0.148	0.154	0.125	0.126	0.128
2.5	0.191	0.202	0.202	0.227	0.246	0.234	0.208	0.223	0.229	0.224	0.23	0.216	0.179	0.182	0.19	0.128	0.128	0.131
3	0.268	0.292	0.298	0.353	0.412	0.391	0.324	0.345	0.351	0.349	0.367	0.326	0.232	0.229	0.249	0.133	0.131	0.135
3.5	0.409	0.439	0.447	0.594	0.648	0.63	0.497	0.538	0.54	0.522	0.537	0.494	0.304	0.308	0.328	0.14	0.137	0.142
4	0.581	0.625	0.698	0.788	0.793	0.777	0.683	0.724	0.718	0.679	0.719	0.663	0.39	0.392	0.419	0.141	0.136	0.144
4.5	0.765	0.809	0.899	0.937	0.915	0.89	0.802	0.839	0.841	0.791	0.822	0.774	0.466	0.47	0.489	0.147	0.139	0.148
5	0.903	0.933	1.01	0.985	0.99	0.955	0.881	0.885	0.908	0.838	0.868	0.822	0.52	0.522	0.536	0.149	0.14	0.149
5.5	0.959	0.985	1.025	0.999	1.009	0.989	0.924	0.925	0.951	0.857	0.885	0.841	0.545	0.552	0.562	0.15	0.145	0.147
6	0.989	1.037	1.043	1.008	1.016	0.987	0.943	0.94	0.971	0.859	0.892	0.843	0.558	0.566	0.57	0.15	0.154	0.146
6.5	0.994	1.053	1.061	0.997	0.983	0.969	0.948	0.953	0.971	0.858	0.897	0.844	0.561	0.567	0.575	0.152	0.16	0.146
7	1.028	1.063	1.082	1.053	1.021	1.004	0.949	0.946	0.971	0.868	0.894	0.855	0.564	0.564	0.567	0.153	0.176	0.144
7.5	1.067	1.115	1.115	1.069	1.045	1.026	0.962	0.949	0.975	0.867	0.888	0.856	0.552	0.559	0.562	0.153	0.181	0.14
8	1.132	1.143	1.159	1.111	1.069	1.042	0.972	0.956	0.984	0.866	0.884	0.859	0.549	0.555	0.553	0.151	0.186	0.136
8.5	1.137	1.15	1.161	1.051	1.057	1.031	0.966	0.952	0.984	0.855	0.877	0.85	0.6	0.545	0.546	0.154	0.194	0.133
9	1.136	1.151	1.166	1.012	1.033	1.012	0.959	0.946	0.975	0.841	0.87	0.841	0.629	0.54	0.539	0.158	0.203	0.133
9.5	1.138	1.155	1.153	0.988	1.033	1.007	0.955	0.938	0.967	0.836	0.853	0.834	0.631	0.534	0.533	0.159	0.206	0.134
10	1.157	1.151	1.149	0.979	1.048	1.025	0.945	0.928	0.97	0.839	0.852	0.832	0.622	0.528	0.525	0.166	0.21	0.133
10.5	1.159	1.157	1.144	0.967	1.057	1.048	0.949	0.926	0.968	0.842	0.848	0.829	0.617	0.523	0.519	0.177	0.211	0.13
11	1.156	1.147	1.132	0.964	1.03	1.03	0.935	0.926	0.965	0.836	0.845	0.824	0.609	0.517	0.512	0.18	0.205	0.128
11.5	1.176	1.147	1.127	0.96	1.026	1.039	0.932	0.921	0.966	0.839	0.839	0.823	0.601	0.513	0.508	0.187	0.199	0.128
12	1.169	1.143	1.12	0.962	0.987	1.003	0.928	0.916	0.958	0.831	0.842	0.818	0.592	0.508	0.501	0.177	0.191	0.127
12.5	1.183	1.131	1.114	0.941	0.999	1.018	0.923	0.908	0.96	0.836	0.841	0.815	0.583	0.504	0.496	0.188	0.185	0.126
13	1.166	1.129	1.11	0.965	0.975	0.984	0.927	0.91	0.958	0.825	0.836	0.809	0.572	0.5	0.495	0.175	0.18	0.124
13.5	1.189	1.13	1.112	0.963	0.991	1.012	0.922	0.907	0.961	0.841	0.832	0.814	0.561	0.496	0.505	0.192	0.186	0.122
14	1.16	1.127	1.11	1.003	0.959	0.972	0.922	0.911	0.957	0.833	0.83	0.805	0.553	0.494	0.498	0.184	0.183	0.121
14.5	1.231	1.136	1.12	0.987	1.011	1.041	0.931	0.921	0.974	0.858	0.824	0.821	0.544	0.491	0.494	0.184	0.191	0.119
15	1.195	1.123	1.114	0.99	0.993	1.008	0.922	0.913	0.961	0.858	0.819	0.828	0.535	0.488	0.489	0.185	0.191	0.117
