# Supplementary material for: Secreted antigen A peptidoglycan hydrolase is essential for Enterococcus faecium cell separation and priming of immune checkpoint inhibitor therapy
Source: eLife. 2024 Jun 10;13:RP95297. doi: 10.7554/eLife.95297 (PMC11164530; doi:10.7554/eLife.95297)
Supplement: Figure 1—source data 1. [file elife-95297-fig1-data1.xlsx]

## Sheet: Sheet1
Time (Hours)	WT			ΔsagA			WT/ Empty Vector			ΔsagA/ psgaA			ΔsagA/ psagA (C431A)
0	0.123	0.123	0.143	0.115	0.117	0.115	0.116	0.115	0.117	0.121	0.123	0.122	0.117	0.113	0.113
0.5	0.123	0.123	0.157	0.116	0.118	0.117	0.116	0.115	0.121	0.122	0.124	0.122	0.112	0.114	0.113
1	0.133	0.133	0.181	0.119	0.12	0.12	0.118	0.117	0.124	0.124	0.128	0.125	0.113	0.115	0.114
1.5	0.163	0.161	0.217	0.124	0.124	0.124	0.122	0.121	0.128	0.132	0.137	0.133	0.115	0.117	0.116
2	0.229	0.233	0.28	0.128	0.129	0.13	0.126	0.125	0.133	0.148	0.155	0.151	0.116	0.118	0.118
2.5	0.368	0.388	0.398	0.136	0.137	0.138	0.131	0.131	0.137	0.185	0.191	0.195	0.119	0.122	0.121
3	0.586	0.61	0.593	0.147	0.146	0.15	0.136	0.137	0.144	0.259	0.27	0.291	0.123	0.126	0.127
3.5	0.837	0.873	0.835	0.162	0.161	0.167	0.144	0.146	0.152	0.39	0.412	0.444	0.129	0.132	0.133
4	0.99	1.069	1	0.185	0.181	0.191	0.156	0.16	0.163	0.573	0.606	0.645	0.137	0.141	0.143
4.5	1.08	1.118	1.093	0.218	0.209	0.225	0.171	0.177	0.179	0.748	0.809	0.856	0.147	0.153	0.157
5	1.147	1.173	1.155	0.261	0.248	0.27	0.192	0.202	0.2	0.897	0.951	0.98	0.162	0.169	0.175
5.5	1.192	1.228	1.206	0.32	0.3	0.33	0.222	0.235	0.23	0.95	0.99	1.023	0.183	0.192	0.2
6	1.251	1.255	1.23	0.394	0.366	0.404	0.262	0.28	0.271	0.996	1.013	1.041	0.211	0.223	0.234
6.5	1.286	1.292	1.27	0.48	0.442	0.492	0.318	0.34	0.328	1.026	1.04	1.04	0.248	0.264	0.281
7	1.31	1.304	1.29	0.568	0.52	0.581	0.387	0.412	0.4	1.048	1.06	1.046	0.297	0.315	0.338
7.5	1.325	1.316	1.305	0.637	0.589	0.651	0.467	0.497	0.48	1.064	1.075	1.042	0.357	0.38	0.411
8	1.335	1.326	1.316	0.68	0.639	0.705	0.551	0.583	0.565	1.09	1.093	1.058	0.425	0.451	0.492
8.5	1.341	1.338	1.322	0.717	0.676	0.744	0.627	0.655	0.637	1.11	1.095	1.066	0.5	0.526	0.575
9	1.348	1.342	1.325	0.747	0.706	0.775	0.674	0.698	0.682	1.119	1.108	1.088	0.57	0.595	0.649
9.5	1.349	1.342	1.329	0.773	0.729	0.802	0.702	0.723	0.71	1.126	1.114	1.098	0.621	0.645	0.706
10	1.353	1.351	1.334	0.799	0.752	0.826	0.721	0.737	0.727	1.135	1.113	1.105	0.656	0.675	0.741
