# Supplementary material for: Secreted antigen A peptidoglycan hydrolase is essential for Enterococcus faecium cell separation and priming of immune checkpoint inhibitor therapy
Source: eLife. 2024 Jun 10;13:RP95297. doi: 10.7554/eLife.95297 (PMC11164530; doi:10.7554/eLife.95297)
Supplement: Figure 2—figure supplement 1—source data 1. [file elife-95297-fig2-figsupp1-data1.xlsx]

## Sheet: Fig 2 fig suppl 1c cell wall
WT	ΔsagA	ΔsagA/psagA
52.75	64.355	62.245
54.86	61.19	49.585
49.585	45.365	66.465
59.08	68.575	48.53
44.31	44.31	45.365
45.365	30.595	36.925
46.42	39.035	66.465
50.64	32.705	43.255
55.915	35.87	68.575
42.2	44.31	59.08
46.42	51.695	43.255
41.145	58.025	53.805
44.31	61.19	49.585
54.86	52.75	45.365
40.09	44.31	40.09
39.035	55.915	49.585
49.585	56.97	42.2
53.805	55.915	47.475
42.2	53.805	58.025
46.42	51.695	42.2
50.64	40.09	40.09
55.915	40.09	44.31
44.31	42.2	54.86
51.695	46.42	64.355
45.365	52.75	47.475
47.475	54.86	27.43
39.035	61.19	45.365
59.08	71.74	46.42
42.2	39.035	48.53
50.64	42.2	53.805
48.53	45.365	40.09
41.145	59.08	13.715
59.08	48.53	52.75
40.09	51.695	44.31
39.035	47.475	39.035
40.09	58.025	51.695
56.97	55.915	44.31
43.255	53.805	44.31
60.135	35.87	49.585
48.53	45.365	44.31
61.19	35.87	50.64
48.53	44.31	59.08
52.75	51.695	41.145
52.75	54.86	42.2
46.42	50.64	45.365
50.64	52.75	40.09
46.42	55.915	40.09
45.365	50.64	43.255
46.42	46.42	81.235
54.86	56.97	55.915
44.31	52.75	58.025
50.64	52.75	52.75
46.42	44.31	72.795
41.145	36.925	44.31
51.695	49.585	74.905
41.145	48.53	54.86
41.145	42.2	47.475
46.42	49.585	43.255
47.475	44.31	34.815
43.255	39.035	42.2
51.695	43.255	40.09
50.64	37.98	48.53
47.475	53.805	39.035
49.585	50.64	22.155
45.365	51.695	55.915
53.805	50.64	36.925
	50.64	48.53
	56.97	42.2
	63.3	49.585
	62.245
	56.97
	58.025
	34.815
	47.475
	44.31
	53.805
	46.42
	63.3
	45.365
	90.73
	43.255
	55.915
	46.42
	63.3
	39.035
	43.255
	48.53
	42.2
	49.585
	62.245
	62.245
	37.98
	39.035
	43.255
	42.2
	58.025

## Sheet: Fig 2 fig suppl 1d septum
WT	ΔsagA	ΔsagA/psagA
58.025	65.41	70.685
61.19	72.795	42.2
52.75	52.75	50.64
53.805	51.695	56.97
61.19	53.805	59.08
56.97	62.245	66.465
60.135	51.695	49.585
53.805	65.41	63.3
49.585	52.75	54.86
48.53	59.08	52.75
49.585	54.86	48.53
53.805	55.915	59.08
60.135	61.19	72.795
55.915	59.08	58.025
77.015	52.75	52.75
63.3	60.135	58.025
53.805	51.695
58.025	54.86
60.135	49.585
52.75	45.365
64.355	52.75
52.75	60.135
52.75	54.86
48.53	54.86
47.475	61.19
54.86	49.585
	59.08
	52.75
	49.585
	67.52
	48.53
	60.135
	61.19
	53.805
	53.805
	46.42
	65.41
	54.86
	54.86
	59.08
	58.025
	52.75
	49.585
	54.86
	63.3
	70.685
	61.19
	74.905
	63.3
	52.75
	46.42
	49.585
	46.42
	59.08
	51.695
	51.695
	62.245
	51.695
	60.135
	64.355
	58.025
	58.025

## Sheet: Fig 2 fig suppl 1e divisome
WT	ΔsagA	ΔsagA/psagA
0.461538	0.4	0.466667
0.470588	0.5	0.4375
0.583333	0.461538	0.6
0.5	0.5	0.411765
0.5	0.5	0.5
0.466667	0.466667	0.5
0.571429	0.533333	0.428571
0.466667	0.571429	0.625
0.461538	0.571429	0.538462
0.5	0.428571	0.533333
0.538462	0.466667	0.428571
0.538462	0.5	0.428571
0.5	0.5625	0.461538
0.466667	0.466667	0.5
0.416667	0.466667	0.466667
0.533333	0.5	0.571429
0.5	0.5	0.470588
0.5	0.5	0.5
0.5	0.533333	0.5
0.466667	0.416667	0.529412
0.538462	0.5	0.5
0.466667	0.533333	0.5
0.461538	0.529412	0.5
0.428571	0.538462	0.428571
0.538462	0.5	0.466667
0.5	0.5	0.4375
0.5	0.466667	0.461538
0.538462	0.428571	0.5
0.611111	0.5	0.538462
0.6	0.466667	0.416667
0.428571	0.538462	0.428571
	0.5	0.352941
	0.526316	0.538462
	0.533333	0.5
	0.533333	0.466667
	0.466667	0.5
	0.529412	0.5
	0.466667	0.5
	0.538462	0.533333
	0.615385	0.466667
		0.466667
		0.533333
