# Supplementary material for: Secreted antigen A peptidoglycan hydrolase is essential for Enterococcus faecium cell separation and priming of immune checkpoint inhibitor therapy
Source: eLife. 2024 Jun 10;13:RP95297. doi: 10.7554/eLife.95297 (PMC11164530; doi:10.7554/eLife.95297)
Supplement: Figure 2—source data 1. [file elife-95297-fig2-data1.xlsx]

## Sheet: Fig 2e
WT	ΔsagA	ΔsagA/psagA
82	66	81
87	87	90
89	71	86
87	74	90
89	87	87
82	80	90
85	85	89
90	90	84
90	85	60
88	40	46
88	69	77
83	70	83
83	76	83
89	84	89
88	84	88
87	75	88
88	87	88
90	61	87
78	85	87
88	77	89
88	66	88
88	88	77
81	72	73
87	41	89
88	86	88
90	84	86
90	81	85
90	71	78
90	71	87
86	60	90
89	64	88
88	70	88
87	75	90
89	83	89
90	90	85
88	85	90
88	87	79
84	50
88	90
90	89
	79
	88
	83
	52
	85
	90
	75
	38
	76

## Sheet: Fig 2f
WT-septum1	WT-septum2	ΔsagA-septum1	ΔsagA-septum2	ΔsagA/psagA-septum1	ΔsagA/psagA-septum2
87	88	87	60	90	88
89	81	71	70	86	77
89	87	74	75	87	73
82	88	80	83	90	89
85	90	85	90	89	88
90	90	90	87	84	86
90	90	40	50	60	85
88	90	70	89	83	78
88	86	75	79	83	87
83	89	87	88	89	90
83	88	77	52	88	88
89	87	66	85	88	88
88	89	88	90	88	89
87	90	72	75	87	85
88	88	41	38	87	90
78	88	86	76	89	79
88	88
88	90
