# Supplementary material for: Secreted antigen A peptidoglycan hydrolase is essential for Enterococcus faecium cell separation and priming of immune checkpoint inhibitor therapy
Source: eLife. 2024 Jun 10;13:RP95297. doi: 10.7554/eLife.95297 (PMC11164530; doi:10.7554/eLife.95297)
Supplement: Figure 3—figure supplement 1—source data 1. [file elife-95297-fig3-figsupp1-data1.xlsx]

## Sheet: WT
Time (min)	Normalized absorbance
3.1975	0.140362
3.20083	0.135162
3.20417	0.130253
3.2075	0.125621
3.21083	0.121239
3.21417	0.117099
3.2175	0.113205
3.22083	0.10953
3.22417	0.106038
3.2275	0.102705
3.23083	0.099527
3.23417	0.096496
3.2375	0.093581
3.24083	0.090768
3.24417	0.088063
3.2475	0.085469
3.25083	0.082982
3.25417	0.080601
3.2575	0.078346
3.26083	0.076236
3.26417	0.074288
3.2675	0.072515
3.27083	0.070926
3.27417	0.069536
3.2775	0.068368
3.28083	0.067455
3.28417	0.06682
3.2875	0.066484
3.29083	0.066457
3.29417	0.066754
3.2975	0.067378
3.30083	0.068325
3.30417	0.069574
3.3075	0.071102
3.31083	0.072905
3.31417	0.074969
3.3175	0.077249
3.32083	0.079686
3.32417	0.082244
3.3275	0.084904
3.33083	0.087628
3.33417	0.090379
3.3375	0.093153
3.34083	0.09595
3.34417	0.098748
3.3475	0.101512
3.35083	0.10421
3.35417	0.10682
3.3575	0.109313
3.36083	0.11166
3.36417	0.113839
3.3675	0.115825
3.37083	0.117601
3.37417	0.119146
3.3775	0.120437
3.38083	0.121461
3.38417	0.12221
3.3875	0.122682
3.39083	0.122883
3.39417	0.122818
3.3975	0.122497
3.40083	0.121943
3.40417	0.12117
3.4075	0.120201
3.41083	0.119049
3.41417	0.117749
3.4175	0.116347
3.42083	0.114866
3.42417	0.113343
3.4275	0.111829
3.43083	0.110371
3.43417	0.10899
3.4375	0.107688
3.44083	0.106483
3.44417	0.105388
3.4475	0.104397
3.45083	0.103506
3.45417	0.102706
3.4575	0.101995
3.46083	0.101353
3.46417	0.100762
3.4675	0.100208
3.47083	0.099677
3.47417	0.099154
3.4775	0.098616
3.48083	0.098048
3.48417	0.09745
3.4875	0.096818
3.49083	0.09615
3.49417	0.095444
3.4975	0.094713
3.50083	0.093975
3.50417	0.093229
3.5075	0.092466
3.51083	0.091683
3.51417	0.090894
3.5175	0.090108
3.52083	0.089321
3.52417	0.088522
3.5275	0.087713
3.53083	0.086895
3.53417	0.086062
3.5375	0.085213
3.54083	0.084346
3.54417	0.083461
3.5475	0.082548
3.55083	0.081598
3.55417	0.080613
3.5575	0.079584
3.56083	0.078505
3.56417	0.077381
3.5675	0.076229
3.57083	0.075065
3.57417	0.073885
3.5775	0.072686
3.58083	0.071468
3.58417	0.070236
3.5875	0.068993
3.59083	0.067747
3.59417	0.066513
3.5975	0.065308
3.60083	0.064143
3.60417	0.063022
3.6075	0.061937
3.61083	0.060884
3.61417	0.059863
3.6175	0.058884
3.62083	0.057955
3.62417	0.057074
3.6275	0.056244
3.63083	0.055476
3.63417	0.054773
3.6375	0.054117
3.64083	0.053492
3.64417	0.052896
3.6475	0.05233
3.65083	0.051776
3.65417	0.051209
3.6575	0.050633
3.66083	0.05005
3.66417	0.049461
3.6675	0.048851
3.67083	0.048213
3.67417	0.047541
3.6775	0.046837
3.68083	0.046102
3.68417	0.045329
3.6875	0.044516
3.69083	0.043667
3.69417	0.042799
3.6975	0.041903
3.70083	0.040965
3.70417	0.03998
3.7075	0.038955
3.71083	0.037909
3.71417	0.036848
3.7175	0.035789
3.72083	0.034748
3.72417	0.033734
3.7275	0.032744
3.73083	0.031782
3.73417	0.030853
3.7375	0.029952
3.74083	0.029069
3.74417	0.028217
3.7475	0.027408
3.75083	0.02665
3.75417	0.025944
3.7575	0.025297
3.76083	0.024724
3.76417	0.024227
3.7675	0.023815
3.77083	0.023483
3.77417	0.023222
3.7775	0.023025
3.78083	0.022897
3.78417	0.022843
3.7875	0.022863
3.79083	0.022959
3.79417	0.023131
3.7975	0.023377
3.80083	0.023687
3.80417	0.024062
3.8075	0.02448
3.81083	0.024929
3.81417	0.025403
3.8175	0.025896
3.82083	0.026398
3.82417	0.0269
3.8275	0.0274
3.83083	0.027889
3.83417	0.028365
3.8375	0.028838
3.84083	0.029315
3.84417	0.029787
3.8475	0.030236
3.85083	0.030668
3.85417	0.031095
3.8575	0.031515
3.86083	0.031926
3.86417	0.032323
3.8675	0.032712
3.87083	0.033101
3.87417	0.033485
3.8775	0.033863
3.88083	0.03424
3.88417	0.034639
3.8875	0.035078
3.89083	0.035564
3.89417	0.036104
3.8975	0.036705
3.90083	0.037352
3.90417	0.038032
3.9075	0.038747
3.91083	0.039504
3.91417	0.040308
3.9175	0.041169
3.92083	0.042101
3.92417	0.043114
3.9275	0.044205
3.93083	0.045373
3.93417	0.046607
3.9375	0.047893
3.94083	0.049226
3.94417	0.050614
3.9475	0.052058
3.95083	0.053546
3.95417	0.055074
3.9575	0.056646
3.96083	0.058264
3.96417	0.059917
3.9675	0.061591
3.97083	0.06328
3.97417	0.06498
3.9775	0.066672
3.98083	0.068339
3.98417	0.069979
3.9875	0.071599
3.99083	0.073186
3.99417	0.074725
3.9975	0.076202
4.00083	0.07762
4.00417	0.078978
4.0075	0.080267
4.01083	0.08148
4.01417	0.082622
4.0175	0.083691
4.02083	0.084682
4.02417	0.085589
4.0275	0.086411
4.03083	0.087152
4.03417	0.08782
4.0375	0.088426
4.04083	0.088979
4.04417	0.089476
4.0475	0.089924
4.05083	0.090323
4.05417	0.090683
4.0575	0.091008
4.06083	0.091296
4.06417	0.091558
4.0675	0.091798
4.07083	0.092026
4.07417	0.092244
4.0775	0.092457
4.08083	0.092667
4.08417	0.092877
4.0875	0.09309
4.09083	0.093309
4.09417	0.093536
4.0975	0.093771
4.10083	0.094024
4.10417	0.094306
4.1075	0.094611
4.11083	0.094932
4.11417	0.095275
4.1175	0.095649
4.12083	0.096058
4.12417	0.096503
4.1275	0.096997
4.13083	0.097538
4.13417	0.098111
4.1375	0.098712
4.14083	0.099342
4.14417	0.100011
4.1475	0.100719
4.15083	0.101465
4.15417	0.102259
4.1575	0.103099
4.16083	0.103978
4.16417	0.104889
4.1675	0.105833
4.17083	0.106816
4.17417	0.107836
4.1775	0.108883
4.18083	0.109948
4.18417	0.111021
4.1875	0.112101
4.19083	0.113184
4.19417	0.114269
4.1975	0.115351
4.20083	0.116427
4.20417	0.117497
4.2075	0.118561
4.21083	0.119605
4.21417	0.120623
4.2175	0.121613
4.22083	0.122575
4.22417	0.123505
4.2275	0.124381
4.23083	0.125193
4.23417	0.12594
4.2375	0.126632
4.24083	0.127269
4.24417	0.127839
4.2475	0.128357
4.25083	0.128841
4.25417	0.129294
4.2575	0.129703
4.26083	0.130061
4.26417	0.130373
4.2675	0.130638
4.27083	0.130854
4.27417	0.13102
4.2775	0.131144
4.28083	0.13124
4.28417	0.131305
4.2875	0.131335
4.29083	0.131325
4.29417	0.131277
4.2975	0.131199
4.30083	0.131093
4.30417	0.130962
4.3075	0.130808
4.31083	0.130635
4.31417	0.130448
4.3175	0.130248
4.32083	0.130034
4.32417	0.129796
4.3275	0.129546
4.33083	0.12929
4.33417	0.129034
4.3375	0.128754
4.34083	0.128443
4.34417	0.128112
4.3475	0.127767
4.35083	0.127418
4.35417	0.127062
4.3575	0.126703
4.36083	0.126336
4.36417	0.125948
4.3675	0.125534
4.37083	0.125078
4.37417	0.124593
4.3775	0.124093
4.38083	0.123594
4.38417	0.123098
4.3875	0.122606
4.39083	0.122117
4.39417	0.121626
4.3975	0.121118
4.40083	0.120591
4.40417	0.120044
4.4075	0.119477
4.41083	0.118895
4.41417	0.118302
4.4175	0.117705
4.42083	0.117108
4.42417	0.116527
4.4275	0.11597
4.43083	0.115418
4.43417	0.114871
4.4375	0.114331
4.44083	0.113813
4.44417	0.113305
4.4475	0.112811
4.45083	0.112345
4.45417	0.111916
4.4575	0.111535
4.46083	0.111196
4.46417	0.11091
4.4675	0.110689
4.47083	0.110546
4.47417	0.110489
4.4775	0.110525
4.48083	0.110676
4.48417	0.110971
4.4875	0.111437
4.49083	0.112114
4.49417	0.113058
4.4975	0.114343
4.50083	0.116037
4.50417	0.118225
4.5075	0.12099
4.51083	0.124407
4.51417	0.128541
4.5175	0.133457
4.52083	0.139209
4.52417	0.14581
4.5275	0.15327
4.53083	0.161584
4.53417	0.170752
4.5375	0.180736
4.54083	0.191482
4.54417	0.202927
4.5475	0.215013
4.55083	0.227661
4.55417	0.240773
4.5575	0.254226
4.56083	0.267933
4.56417	0.281807
4.5675	0.295757
4.57083	0.309682
4.57417	0.323498
4.5775	0.33716
4.58083	0.350597
4.58417	0.36374
4.5875	0.376517
4.59083	0.388882
4.59417	0.400794
4.5975	0.412184
4.60083	0.423003
4.60417	0.433234
4.6075	0.442879
4.61083	0.451924
4.61417	0.460352
4.6175	0.468168
4.62083	0.475373
4.62417	0.481955
4.6275	0.487909
4.63083	0.493245
4.63417	0.497986
4.6375	0.502143
4.64083	0.505724
4.64417	0.50874
4.6475	0.5112
4.65083	0.513118
4.65417	0.514515
4.6575	0.515403
4.66083	0.515805
4.66417	0.515747
4.6675	0.515256
4.67083	0.514354
4.67417	0.513045
4.6775	0.511359
4.68083	0.509324
4.68417	0.506956
4.6875	0.504253
4.69083	0.501232
4.69417	0.49792
4.6975	0.494325
4.70083	0.490449
4.70417	0.486317
4.7075	0.481968
4.71083	0.477421
4.71417	0.472674
4.7175	0.467741
4.72083	0.462651
4.72417	0.457421
4.7275	0.452037
4.73083	0.446504
4.73417	0.440851
4.7375	0.4351
4.74083	0.429252
4.74417	0.423311
4.7475	0.417301
4.75083	0.411226
4.75417	0.405072
4.7575	0.39884
4.76083	0.392552
4.76417	0.386225
4.7675	0.379865
4.77083	0.373497
4.77417	0.367136
4.7775	0.360782
4.78083	0.35443
4.78417	0.348079
4.7875	0.341734
4.79083	0.335393
4.79417	0.329056
4.7975	0.322744
4.80083	0.31647
4.80417	0.310238
4.8075	0.304051
4.81083	0.297912
4.81417	0.291829
4.8175	0.285806
4.82083	0.27985
4.82417	0.273973
4.8275	0.268166
4.83083	0.262429
4.83417	0.256765
4.8375	0.251178
4.84083	0.245666
4.84417	0.240211
4.8475	0.234827
4.85083	0.229521
4.85417	0.224307
4.8575	0.219175
4.86083	0.214127
4.86417	0.20918
4.8675	0.204349
4.87083	0.199627
4.87417	0.194993
4.8775	0.190452
4.88083	0.186008
4.88417	0.181663
4.8875	0.177394
4.89083	0.173204
4.89417	0.169112
4.8975	0.165122
4.90083	0.16123
4.90417	0.157424
4.9075	0.153701
4.91083	0.150064
4.91417	0.14651
4.9175	0.143042
4.92083	0.13966
4.92417	0.13637
4.9275	0.133176
4.93083	0.130073
4.93417	0.127048
4.9375	0.124091
4.94083	0.121198
4.94417	0.118374
4.9475	0.115621
4.95083	0.112948
4.95417	0.110356
4.9575	0.107848
4.96083	0.105418
4.96417	0.103056
4.9675	0.100762
4.97083	0.098535
4.97417	0.09637
4.9775	0.094269
4.98083	0.092232
4.98417	0.090257
4.9875	0.08834
4.99083	0.086489
4.99417	0.084706
4.9975	0.082984
5.00083	0.081311
5.00417	0.079703
5.0075	0.078162
5.01083	0.076678
5.01417	0.075238
5.0175	0.073848
5.02083	0.072524
5.02417	0.071256
5.0275	0.070035
5.03083	0.068854
5.03417	0.067722
5.0375	0.066632
5.04083	0.065578
5.04417	0.064564
5.0475	0.063592
5.05083	0.062652
5.05417	0.061747
5.0575	0.060877
5.06083	0.060033
5.06417	0.059208
5.0675	0.058406
5.07083	0.057641
5.07417	0.056902
5.0775	0.056186
5.08083	0.055493
5.08417	0.054831
5.0875	0.054186
5.09083	0.053542
5.09417	0.052902
5.0975	0.05228
5.10083	0.051685
5.10417	0.051091
5.1075	0.050495
5.11083	0.049905
5.11417	0.049328
5.1175	0.048757
5.12083	0.048179
5.12417	0.047598
5.1275	0.047028
5.13083	0.046475
5.13417	0.045922
5.1375	0.045366
5.14083	0.044812
5.14417	0.04427
5.1475	0.043732
5.15083	0.043195
5.15417	0.042658
5.1575	0.042129
5.16083	0.041614
5.16417	0.041105
5.1675	0.040602
5.17083	0.040103
5.17417	0.03961
5.1775	0.039122
5.18083	0.038641
5.18417	0.038181
5.1875	0.037736
5.19083	0.037298
5.19417	0.036859
5.1975	0.03643
5.20083	0.036017
5.20417	0.035623
5.2075	0.03525
5.21083	0.034904
5.21417	0.034581
5.2175	0.034284
5.22083	0.034009
5.22417	0.033753
5.2275	0.033517
5.23083	0.033307
5.23417	0.033123
5.2375	0.032945
5.24083	0.032767
5.24417	0.032592
5.2475	0.032427
5.25083	0.032271
5.25417	0.032131
5.2575	0.032024
5.26083	0.031937
5.26417	0.031852
5.2675	0.031765
5.27083	0.031685
5.27417	0.031615
5.2775	0.031546
5.28083	0.031486
5.28417	0.031437
5.2875	0.031403
5.29083	0.031369
5.29417	0.031329
5.2975	0.031282
5.30083	0.031229
5.30417	0.031178
5.3075	0.031118
5.31083	0.031055
5.31417	0.030988
5.3175	0.030927
5.32083	0.030871
5.32417	0.030807
5.3275	0.030744
5.33083	0.030684
5.33417	0.030625
5.3375	0.030556
5.34083	0.030478
5.34417	0.030406
5.3475	0.030329
5.35083	0.030249
5.35417	0.030168
5.3575	0.030092
5.36083	0.030026
5.36417	0.029969
5.3675	0.029928
5.37083	0.029898
5.37417	0.029875
5.3775	0.029861
5.38083	0.029848
5.38417	0.029832
5.3875	0.029815
5.39083	0.029813
5.39417	0.029824
5.3975	0.02985
5.40083	0.029898
5.40417	0.02996
5.4075	0.030031
5.41083	0.030102
5.41417	0.030179
5.4175	0.030255
5.42083	0.030331
5.42417	0.030424
5.4275	0.030538
5.43083	0.030668
5.43417	0.030806
5.4375	0.030953
5.44083	0.031108
5.44417	0.031265
5.4475	0.031423
5.45083	0.031582
5.45417	0.03175
5.4575	0.031932
5.46083	0.032126
5.46417	0.032328
5.4675	0.032535
5.47083	0.032747
5.47417	0.032953
5.4775	0.033142
5.48083	0.033311
5.48417	0.033469
5.4875	0.033623
5.49083	0.033768
5.49417	0.0339
5.4975	0.034021
5.50083	0.034141
5.50417	0.03425
5.5075	0.034324
5.51083	0.034366
5.51417	0.034385
5.5175	0.034384
5.52083	0.034351
5.52417	0.03429
5.5275	0.034209
5.53083	0.034118
5.53417	0.034017
5.5375	0.033906
5.54083	0.033775
5.54417	0.033615
5.5475	0.033426
5.55083	0.033215
5.55417	0.032983
5.5575	0.032729
5.56083	0.032455
5.56417	0.032168
5.5675	0.031872
5.57083	0.031573
5.57417	0.031268
5.5775	0.03096
5.58083	0.030649
5.58417	0.030339
5.5875	0.030036
5.59083	0.029727
5.59417	0.029411
5.5975	0.029082
5.60083	0.028749
5.60417	0.028415
5.6075	0.028082
5.61083	0.027755
5.61417	0.027436
5.6175	0.027132
5.62083	0.026845
5.62417	0.026572
5.6275	0.026305
5.63083	0.026042
5.63417	0.025779
5.6375	0.025515
5.64083	0.025253
5.64417	0.024995
5.6475	0.024744
5.65083	0.024502
5.65417	0.024273
5.6575	0.024061
5.66083	0.023859
5.66417	0.023666
5.6675	0.02348
5.67083	0.023305
5.67417	0.023146
5.6775	0.023001
5.68083	0.022873
5.68417	0.022759
5.6875	0.022653
5.69083	0.02255
5.69417	0.022456
5.6975	0.022366
5.70083	0.02228
5.70417	0.022204
5.7075	0.022142
5.71083	0.022089
5.71417	0.022048
5.7175	0.02203
5.72083	0.022038
5.72417	0.022061
5.7275	0.022097
5.73083	0.02215
5.73417	0.022238
5.7375	0.022346
5.74083	0.022464
5.74417	0.022591
5.7475	0.022735
5.75083	0.022899
5.75417	0.023067
5.7575	0.023237
5.76083	0.023415
5.76417	0.02361
5.7675	0.023825
5.77083	0.024059
5.77417	0.024324
5.7775	0.024627
5.78083	0.02496
5.78417	0.025303
5.7875	0.025644
5.79083	0.025984
5.79417	0.026322
5.7975	0.026652
5.80083	0.026975
5.80417	0.027304
5.8075	0.027649
5.81083	0.028005
5.81417	0.028362
5.8175	0.02871
5.82083	0.029052
5.82417	0.029393
5.8275	0.029718
5.83083	0.030023
5.83417	0.030314
5.8375	0.030605
5.84083	0.030894
5.84417	0.031174
5.8475	0.031449
5.85083	0.031717
5.85417	0.031975
5.8575	0.032215
5.86083	0.032435
5.86417	0.032647
5.8675	0.032852
5.87083	0.033056
5.87417	0.033256
5.8775	0.033456
5.88083	0.033662
5.88417	0.033878
5.8875	0.034108
5.89083	0.03434
5.89417	0.034571
5.8975	0.034802
5.90083	0.035034
5.90417	0.035272
5.9075	0.035514
5.91083	0.035769
5.91417	0.036052
5.9175	0.036365
5.92083	0.036706
5.92417	0.037077
5.9275	0.037471
5.93083	0.037888
5.93417	0.038313
5.9375	0.038746
5.94083	0.039184
5.94417	0.039628
5.9475	0.040084
5.95083	0.040564
5.95417	0.041061
5.9575	0.041567
5.96083	0.042079
5.96417	0.042601
5.9675	0.04313
5.97083	0.043652
5.97417	0.044171
5.9775	0.044688
5.98083	0.045196
5.98417	0.045689
5.9875	0.046161
5.99083	0.046626
5.99417	0.047081
5.9975	0.047525
6.00083	0.047966
6.00417	0.048397
6.0075	0.048804
6.01083	0.049179
6.01417	0.049527
6.0175	0.049841
6.02083	0.050121
6.02417	0.050366
6.0275	0.050583
6.03083	0.050773
6.03417	0.050927
6.0375	0.051046
6.04083	0.05113
6.04417	0.051185
6.0475	0.051212
6.05083	0.051207
6.05417	0.051176
6.0575	0.051121
6.06083	0.051047
6.06417	0.05095
6.0675	0.050822
6.07083	0.050663
6.07417	0.050477
6.0775	0.050268
6.08083	0.050033
6.08417	0.049772
6.0875	0.049488
6.09083	0.049187
6.09417	0.048879
6.0975	0.048555
6.10083	0.048219
6.10417	0.047877
6.1075	0.047542
6.11083	0.047211
6.11417	0.046875
6.1175	0.046549
6.12083	0.046239
6.12417	0.045943
6.1275	0.045662
6.13083	0.045401
6.13417	0.045176
6.1375	0.044985
6.14083	0.044836
6.14417	0.04473
6.1475	0.044666
6.15083	0.044641
6.15417	0.044661
6.1575	0.044729
6.16083	0.044852
6.16417	0.045035
6.1675	0.045305
6.17083	0.045676
6.17417	0.046148
6.1775	0.046713
6.18083	0.047374
6.18417	0.048145
6.1875	0.049034
6.19083	0.050054
6.19417	0.051211
6.1975	0.052527
6.20083	0.054012
6.20417	0.055675
6.2075	0.057515
6.21083	0.059525
6.21417	0.061711
6.2175	0.064095
6.22083	0.066693
6.22417	0.069512
6.2275	0.072569
6.23083	0.075874
6.23417	0.079436
6.2375	0.083248
6.24083	0.087305
6.24417	0.091611
6.2475	0.096167
6.25083	0.100982
6.25417	0.106056
6.2575	0.111395
6.26083	0.116998
6.26417	0.122857
6.2675	0.128962
6.27083	0.135305
6.27417	0.14188
6.2775	0.148665
6.28083	0.155656
6.28417	0.162847
6.2875	0.170229
6.29083	0.177776
6.29417	0.185471
6.2975	0.193298
6.30083	0.201229
6.30417	0.209235
6.3075	0.217306
6.31083	0.225438
6.31417	0.233613
6.3175	0.241806
6.32083	0.249988
6.32417	0.258129
6.3275	0.266196
6.33083	0.274162
6.33417	0.282009
6.3375	0.289716
6.34083	0.297263
6.34417	0.304618
6.3475	0.311759
6.35083	0.318646
6.35417	0.325252
6.3575	0.331576
6.36083	0.337609
6.36417	0.343354
6.3675	0.348789
6.37083	0.353918
6.37417	0.358726
6.3775	0.363185
6.38083	0.367275
6.38417	0.370991
6.3875	0.374336
6.39083	0.3773
6.39417	0.379871
6.3975	0.382052
6.40083	0.383847
6.40417	0.385251
6.4075	0.386258
6.41083	0.386864
6.41417	0.387077
6.4175	0.386901
6.42083	0.386349
6.42417	0.385436
6.4275	0.384176
6.43083	0.382576
6.43417	0.380646
6.4375	0.378406
6.44083	0.375866
6.44417	0.373034
6.4475	0.369916
6.45083	0.366519
6.45417	0.362863
6.4575	0.358959
6.46083	0.354828
6.46417	0.350477
6.4675	0.345933
6.47083	0.341218
6.47417	0.336336
6.4775	0.33129
6.48083	0.326073
6.48417	0.3207
6.4875	0.315171
6.49083	0.309503
6.49417	0.303722
6.4975	0.297855
6.50083	0.291917
6.50417	0.285917
6.5075	0.279871
6.51083	0.273789
6.51417	0.267663
6.5175	0.26149
6.52083	0.255295
6.52417	0.249105
6.5275	0.242925
6.53083	0.236756
6.53417	0.230621
6.5375	0.224527
6.54083	0.218462
6.54417	0.212416
6.5475	0.206399
6.55083	0.200435
6.55417	0.194537
6.5575	0.188709
6.56083	0.182961
6.56417	0.177308
6.5675	0.171754
6.57083	0.166293
6.57417	0.160922
6.5775	0.155652
6.58083	0.150488
6.58417	0.145423
6.5875	0.14046
6.59083	0.135609
6.59417	0.130882
6.5975	0.126282
6.60083	0.121815
6.60417	0.117476
6.6075	0.113257
6.61083	0.109147
6.61417	0.105136
6.6175	0.101226
6.62083	0.097418
6.62417	0.09373
6.6275	0.090182
6.63083	0.086783
6.63417	0.083513
6.6375	0.080359
6.64083	0.07732
6.64417	0.07439
6.6475	0.071549
6.65083	0.068786
6.65417	0.066116
6.6575	0.063549
6.66083	0.061087
6.66417	0.058725
6.6675	0.056462
6.67083	0.054292
6.67417	0.052224
6.6775	0.050259
6.68083	0.048388
6.68417	0.0466
6.6875	0.044886
6.69083	0.043249
6.69417	0.041673
6.6975	0.040144
6.70083	0.038677
6.70417	0.037283
6.7075	0.035966
6.71083	0.034722
6.71417	0.033558
6.7175	0.032476
6.72083	0.031461
6.72417	0.030499
6.7275	0.029585
6.73083	0.028722
6.73417	0.027899
6.7375	0.027114
6.74083	0.026379
6.74417	0.025708
6.7475	0.025103
6.75083	0.024548
6.75417	0.024043
6.7575	0.023583
6.76083	0.023163
6.76417	0.022779
6.7675	0.022425
6.77083	0.022106
6.77417	0.021824
6.7775	0.021586
6.78083	0.021382
6.78417	0.021201
6.7875	0.021037
6.79083	0.020897
6.79417	0.020782
6.7975	0.02069
6.80083	0.020621
6.80417	0.020581
6.8075	0.02057
6.81083	0.020589
6.81417	0.020636
6.8175	0.020697
6.82083	0.020764
6.82417	0.020834
6.8275	0.02092
6.83083	0.021023
6.83417	0.02113
6.8375	0.021244
6.84083	0.021366
6.84417	0.021497
6.8475	0.021624
6.85083	0.021734
6.85417	0.021829
6.8575	0.021915
6.86083	0.021992
6.86417	0.022058
6.8675	0.022113
6.87083	0.022166
6.87417	0.022218
6.8775	0.022267
6.88083	0.022311
6.88417	0.022341
6.8875	0.022354
6.89083	0.022351
6.89417	0.022337
6.8975	0.022306
6.90083	0.022256
6.90417	0.022194
6.9075	0.022133
6.91083	0.022065
6.91417	0.021975
6.9175	0.021864
6.92083	0.021732
6.92417	0.02159
6.9275	0.021438
6.93083	0.021284
6.93417	0.021133
6.9375	0.020977
6.94083	0.020813
6.94417	0.020635
6.9475	0.020446
6.95083	0.020239
6.95417	0.020014
6.9575	0.019792
6.96083	0.019578
6.96417	0.019367
6.9675	0.019151
6.97083	0.018929
6.97417	0.01871
6.9775	0.018487
6.98083	0.018257
6.98417	0.018022
6.9875	0.017789
6.99083	0.017553
6.99417	0.017316
6.9975	0.017079
7.00083	0.01684
7.00417	0.0166
7.0075	0.01636
7.01083	0.016121
7.01417	0.015873
7.0175	0.015617
7.02083	0.015365
7.02417	0.015117
7.0275	0.014877
7.03083	0.01465
7.03417	0.014452
7.0375	0.014277
7.04083	0.01411
7.04417	0.013942
7.0475	0.013775
7.05083	0.013613
7.05417	0.013451
7.0575	0.013294
7.06083	0.013138
7.06417	0.012984
7.0675	0.012837
7.07083	0.012698
7.07417	0.012568
7.0775	0.012439
7.08083	0.012327
7.08417	0.012242
7.0875	0.012172
7.09083	0.012109
7.09417	0.012048
7.0975	0.012004
7.10083	0.011973
7.10417	0.011946
7.1075	0.011918
7.11083	0.011898
7.11417	0.011893
7.1175	0.011903
7.12083	0.011934
7.12417	0.011983
7.1275	0.012049
7.13083	0.012124
7.13417	0.012204
7.1375	0.012287
7.14083	0.012366
7.14417	0.012449
7.1475	0.012548
7.15083	0.012665
7.15417	0.012804
7.1575	0.012953
7.16083	0.013094
7.16417	0.01323
7.1675	0.013373
7.17083	0.013531
7.17417	0.013699
7.1775	0.013877
7.18083	0.014087
7.18417	0.014325
7.1875	0.014571
7.19083	0.014806
7.19417	0.015034
7.1975	0.015275
7.20083	0.015526
7.20417	0.015788
7.2075	0.016069
7.21083	0.016374
7.21417	0.016706
7.2175	0.017053
7.22083	0.01741
7.22417	0.017779
7.2275	0.018154
7.23083	0.018538
7.23417	0.018929
7.2375	0.019341
7.24083	0.019773
7.24417	0.020224
7.2475	0.020699
7.25083	0.021195
7.25417	0.021708
7.2575	0.022224
7.26083	0.022743
7.26417	0.023265
7.2675	0.023795
7.27083	0.024335
7.27417	0.024892
7.2775	0.025469
7.28083	0.026063
7.28417	0.026662
7.2875	0.027255
7.29083	0.027842
7.29417	0.028415
7.2975	0.028972
7.30083	0.029516
7.30417	0.030052
7.3075	0.030589
7.31083	0.031124
7.31417	0.03166
7.3175	0.032192
7.32083	0.032717
7.32417	0.033231
7.3275	0.033724
7.33083	0.034191
7.33417	0.03463
7.3375	0.035048
7.34083	0.03545
7.34417	0.035838
7.3475	0.036217
7.35083	0.036585
7.35417	0.036943
7.3575	0.037277
7.36083	0.037584
7.36417	0.037869
7.3675	0.038137
7.37083	0.038381
7.37417	0.038592
7.3775	0.038777
7.38083	0.038945
7.38417	0.039098
7.3875	0.039231
7.39083	0.039347
7.39417	0.039462
7.3975	0.039581
7.40083	0.039697
7.40417	0.039793
7.4075	0.03986
7.41083	0.039904
7.41417	0.039933
7.4175	0.039941
7.42083	0.039919
7.42417	0.039876
7.4275	0.039826
7.43083	0.039773
7.43417	0.039701
7.4375	0.039615
7.44083	0.039519
7.44417	0.039417
7.4475	0.039304
7.45083	0.039168
7.45417	0.039005
7.4575	0.03881
7.46083	0.038584
7.46417	0.038329
7.4675	0.038043
7.47083	0.037736
7.47417	0.037423
7.4775	0.03711
7.48083	0.036792
7.48417	0.036456
7.4875	0.036099
7.49083	0.035727
7.49417	0.035342
7.4975	0.03496
7.50083	0.034576
7.50417	0.034199
7.5075	0.033822
7.51083	0.03345
7.51417	0.033079
7.5175	0.032699
7.52083	0.032316
7.52417	0.031942
7.5275	0.031591
7.53083	0.031252
7.53417	0.030926
7.5375	0.030625
7.54083	0.03035
7.54417	0.030106
7.5475	0.029888
7.55083	0.029701
7.55417	0.029547
7.5575	0.02943
7.56083	0.029353
7.56417	0.029315
7.5675	0.029328
7.57083	0.029398
7.57417	0.029517
7.5775	0.029685
7.58083	0.029901
7.58417	0.03018
7.5875	0.030511
7.59083	0.030902
7.59417	0.031362
7.5975	0.031898
7.60083	0.032509
7.60417	0.033191
7.6075	0.033957
7.61083	0.034804
7.61417	0.035718
7.6175	0.036686
7.62083	0.037712
7.62417	0.038808
7.6275	0.039967
7.63083	0.041183
7.63417	0.042459
7.6375	0.043816
7.64083	0.045252
7.64417	0.046748
7.6475	0.048304
7.65083	0.049925
7.65417	0.05162
7.6575	0.053378
7.66083	0.055192
7.66417	0.057063
7.6675	0.058986
7.67083	0.060951
7.67417	0.062954
7.6775	0.064985
7.68083	0.067044
7.68417	0.069134
7.6875	0.07126
7.69083	0.073419
7.69417	0.075597
7.6975	0.0778
7.70083	0.08003
7.70417	0.082276
7.7075	0.084515
7.71083	0.086743
7.71417	0.088976
7.7175	0.091207
7.72083	0.09342
7.72417	0.095606
7.7275	0.09776
7.73083	0.099882
7.73417	0.101954
7.7375	0.103959
7.74083	0.105896
7.74417	0.107767
7.7475	0.109568
7.75083	0.111293
7.75417	0.112933
7.7575	0.114498
7.76083	0.115983
7.76417	0.117376
7.7675	0.11867
7.77083	0.11986
7.77417	0.120944
7.7775	0.121905
7.78083	0.122738
7.78417	0.123448
7.7875	0.124039
7.79083	0.124496
7.79417	0.124821
7.7975	0.125024
7.80083	0.125106
7.80417	0.125057
7.8075	0.124869
7.81083	0.124557
7.81417	0.124125
7.8175	0.123561
7.82083	0.12287
7.82417	0.122058
7.8275	0.121141
7.83083	0.12012
7.83417	0.119007
7.8375	0.117803
7.84083	0.116499
7.84417	0.115096
7.8475	0.113607
7.85083	0.112038
7.85417	0.110381
7.8575	0.10864
7.86083	0.106831
7.86417	0.104968
7.8675	0.103051
7.87083	0.101089
7.87417	0.09909
7.8775	0.097055
7.88083	0.094998
7.88417	0.092935
7.8875	0.090869
7.89083	0.088782
7.89417	0.086675
7.8975	0.084572
7.90083	0.08248
7.90417	0.08038
7.9075	0.078257
7.91083	0.076134
7.91417	0.074031
7.9175	0.071954
7.92083	0.069899
7.92417	0.067884
7.9275	0.065932
7.93083	0.064028
7.93417	0.062166
7.9375	0.060332
7.94083	0.058541
7.94417	0.056786
7.9475	0.055056
7.95083	0.053364
7.95417	0.051718
7.9575	0.050129
7.96083	0.048578
7.96417	0.047073
7.9675	0.045621
7.97083	0.044221
7.97417	0.042864
7.9775	0.041541
7.98083	0.040261
7.98417	0.039021
7.9875	0.037828
7.99083	0.036684
7.99417	0.035586
7.9975	0.034534
8.00083	0.033526
8.00417	0.032556
8.0075	0.031611
8.01083	0.030689
8.01417	0.029804
8.0175	0.02896
8.02083	0.028156
8.02417	0.027394
8.0275	0.026679
8.03083	0.026003
8.03417	0.025345
8.0375	0.024701
8.04083	0.024075
8.04417	0.023479
8.0475	0.022913
8.05083	0.02238
8.05417	0.021887
8.0575	0.021436
8.06083	0.021016
8.06417	0.020614
8.0675	0.020222
8.07083	0.019847
8.07417	0.01949
8.0775	0.019159
8.08083	0.01885
8.08417	0.018563
8.0875	0.018305
8.09083	0.01808
8.09417	0.017876
8.0975	0.017681
8.10083	0.017489
8.10417	0.017299
8.1075	0.017108
8.11083	0.01691
8.11417	0.016718
8.1175	0.016531
8.12083	0.016364
8.12417	0.016228
8.1275	0.016126
8.13083	0.016044
8.13417	0.015971
8.1375	0.015903
8.14083	0.01584
8.14417	0.015775
8.1475	0.015713
8.15083	0.015661
8.15417	0.015617
8.1575	0.015585
8.16083	0.01556
8.16417	0.015546
8.1675	0.015531
8.17083	0.015516
8.17417	0.015504
8.1775	0.015496
8.18083	0.015495
8.18417	0.015496
8.1875	0.015507
8.19083	0.015529
8.19417	0.015565
8.1975	0.015608
8.20083	0.015654
8.20417	0.015702
8.2075	0.015751
8.21083	0.015806
8.21417	0.015861
8.2175	0.015925
8.22083	0.016001
8.22417	0.016086
8.2275	0.016174
8.23083	0.016263
8.23417	0.01636
8.2375	0.016464
8.24083	0.016582
8.24417	0.016709
8.2475	0.016849
8.25083	0.017001
8.25417	0.017165
8.2575	0.017336
8.26083	0.017504
8.26417	0.017678
8.2675	0.017869
8.27083	0.018077
8.27417	0.018301
8.2775	0.018543
8.28083	0.018809
8.28417	0.019092
8.2875	0.019379
8.29083	0.01968
8.29417	0.019997
8.2975	0.020332
8.30083	0.020679
8.30417	0.021033
8.3075	0.021399
8.31083	0.021775
8.31417	0.022163
8.3175	0.022557
8.32083	0.022955
8.32417	0.023352
8.3275	0.023744
8.33083	0.024129
8.33417	0.024513
8.3375	0.024895
8.34083	0.025284
8.34417	0.025688
8.3475	0.026115
8.35083	0.026551
8.35417	0.026983
8.3575	0.027406
8.36083	0.027816
8.36417	0.028211
8.3675	0.028592
8.37083	0.028961
8.37417	0.029328
8.3775	0.029697
8.38083	0.03006
8.38417	0.030416
8.3875	0.030764
8.39083	0.031101
8.39417	0.031422
8.3975	0.031726
8.40083	0.032018
8.40417	0.032301
8.4075	0.032575
8.41083	0.032847
8.41417	0.033119
8.4175	0.033385
8.42083	0.033638
8.42417	0.033885
8.4275	0.034127
8.43083	0.034357
8.43417	0.034572
8.4375	0.034782
8.44083	0.034991
8.44417	0.035186
8.4475	0.035373
8.45083	0.035558
8.45417	0.035743
8.4575	0.035918
8.46083	0.03607
8.46417	0.036207
8.4675	0.036326
8.47083	0.03643
8.47417	0.036519
8.4775	0.036603
8.48083	0.036693
8.48417	0.036781
8.4875	0.036861
8.49083	0.036926
8.49417	0.036972
8.4975	0.036994
8.50083	0.036999
8.50417	0.036994
8.5075	0.036972
8.51083	0.03693
8.51417	0.036874
8.5175	0.036814
8.52083	0.036742
8.52417	0.036646
8.5275	0.036536
8.53083	0.036427
8.53417	0.036319
8.5375	0.036197
8.54083	0.036054
8.54417	0.035894
8.5475	0.03572
8.55083	0.035524
8.55417	0.035307
8.5575	0.035078
8.56083	0.034849
8.56417	0.034623
8.5675	0.034387
8.57083	0.034148
8.57417	0.033908
8.5775	0.033657
8.58083	0.03339
8.58417	0.033107
8.5875	0.032834
8.59083	0.032564
8.59417	0.032296
8.5975	0.032032
8.60083	0.031778
8.60417	0.031533
8.6075	0.031283
8.61083	0.031023
8.61417	0.030763
8.6175	0.030508
8.62083	0.03026
8.62417	0.030026
8.6275	0.0298
8.63083	0.029576
8.63417	0.029359
8.6375	0.029159
8.64083	0.02898
8.64417	0.028806
8.6475	0.028642
8.65083	0.028492
8.65417	0.02835
8.6575	0.028214
8.66083	0.028088
8.66417	0.027985
8.6675	0.027917
8.67083	0.027889
8.67417	0.027904
8.6775	0.027963
8.68083	0.028065
8.68417	0.028221
8.6875	0.028434
8.69083	0.028713
8.69417	0.029063
8.6975	0.029489
8.70083	0.030007
8.70417	0.030634
8.7075	0.031396
8.71083	0.032307
8.71417	0.03338
8.7175	0.034628
8.72083	0.036056
8.72417	0.037655
8.7275	0.039415
8.73083	0.041351
8.73417	0.043479
8.7375	0.045808
8.74083	0.048342
8.74417	0.051076
8.7475	0.054012
8.75083	0.057129
8.75417	0.060401
8.7575	0.063809
8.76083	0.067343
8.76417	0.071004
8.7675	0.074781
8.77083	0.07866
8.77417	0.082622
8.7775	0.086649
8.78083	0.09073
8.78417	0.094841
8.7875	0.098949
8.79083	0.103033
8.79417	0.107084
8.7975	0.111087
8.80083	0.11502
8.80417	0.118859
8.8075	0.122607
8.81083	0.126263
8.81417	0.129828
8.8175	0.133282
8.82083	0.136619
8.82417	0.139839
8.8275	0.142933
8.83083	0.145893
8.83417	0.148698
8.8375	0.151353
8.84083	0.153873
8.84417	0.156255
8.8475	0.158486
8.85083	0.160555
8.85417	0.162475
8.8575	0.164261
8.86083	0.165901
8.86417	0.167392
8.8675	0.168753
8.87083	0.170006
8.87417	0.17115
8.8775	0.172168
8.88083	0.173061
8.88417	0.173837
8.8875	0.174496
8.89083	0.175033
8.89417	0.175453
8.8975	0.17577
8.90083	0.175989
8.90417	0.176113
8.9075	0.17614
8.91083	0.176076
8.91417	0.175916
8.9175	0.175673
8.92083	0.175353
8.92417	0.174967
8.9275	0.174516
8.93083	0.174
8.93417	0.173431
8.9375	0.172803
8.94083	0.17212
8.94417	0.171374
8.9475	0.170573
8.95083	0.16973
8.95417	0.168842
8.9575	0.167911
8.96083	0.166938
8.96417	0.165934
8.9675	0.164903
8.97083	0.163845
8.97417	0.162754
8.9775	0.161629
8.98083	0.16048
8.98417	0.159311
8.9875	0.158121
8.99083	0.156902
8.99417	0.155656
8.9975	0.154392
9.00083	0.153111
9.00417	0.151813
9.0075	0.150498
9.01083	0.14917
9.01417	0.147836
9.0175	0.1465
9.02083	0.145161
9.02417	0.143808
9.0275	0.142439
9.03083	0.141065
9.03417	0.139696
9.0375	0.138313
9.04083	0.136913
9.04417	0.135509
9.0475	0.134116
9.05083	0.132728
9.05417	0.131328
9.0575	0.129926
9.06083	0.128524
9.06417	0.127129
9.0675	0.125725
9.07083	0.124318
9.07417	0.122916
9.0775	0.121524
9.08083	0.12014
9.08417	0.118761
9.0875	0.117389
9.09083	0.116022
9.09417	0.114661
9.0975	0.113303
9.10083	0.111953
9.10417	0.110612
9.1075	0.109288
9.11083	0.107979
9.11417	0.106669
9.1175	0.105351
9.12083	0.104024
9.12417	0.102696
9.1275	0.101375
9.13083	0.100065
9.13417	0.098776
9.1375	0.097511
9.14083	0.096264
9.14417	0.095024
9.1475	0.093781
9.15083	0.092534
9.15417	0.09129
9.1575	0.090056
9.16083	0.088838
9.16417	0.087639
9.1675	0.086454
9.17083	0.085274
9.17417	0.084103
9.1775	0.08295
9.18083	0.081803
9.18417	0.080655
9.1875	0.079507
9.19083	0.078372
9.19417	0.07725
9.1975	0.076136
9.20083	0.075042
9.20417	0.073967
9.2075	0.0729
9.21083	0.071842
9.21417	0.070791
9.2175	0.069757
9.22083	0.068733
9.22417	0.067733
9.2275	0.066764
9.23083	0.065813
9.23417	0.064869
9.2375	0.063929
9.24083	0.063007
9.24417	0.062097
9.2475	0.061191
9.25083	0.060293
9.25417	0.059418
9.2575	0.058572
9.26083	0.057747
9.26417	0.05694
9.2675	0.05615
9.27083	0.055376
9.27417	0.054616
9.2775	0.053869
9.28083	0.053136
9.28417	0.052415
9.2875	0.051723
9.29083	0.051072
9.29417	0.05045
9.2975	0.049842
9.30083	0.049244
9.30417	0.048669
9.3075	0.048114
9.31083	0.047581
9.31417	0.047067
9.3175	0.046578
9.32083	0.046119
9.32417	0.045691
9.3275	0.04529
9.33083	0.044908
9.33417	0.044553
9.3375	0.044215
9.34083	0.043897
9.34417	0.043592
9.3475	0.043309
9.35083	0.043057
9.35417	0.042834
9.3575	0.042649
9.36083	0.042491
9.36417	0.042358
9.3675	0.042233
9.37083	0.042114
9.37417	0.042011
9.3775	0.041929
9.38083	0.041869
9.38417	0.041831
9.3875	0.041814
9.39083	0.041815
9.39417	0.041828
9.3975	0.04185
9.40083	0.041884
9.40417	0.041934
9.4075	0.041997
9.41083	0.042071
9.41417	0.042153
9.4175	0.042238
9.42083	0.042325
9.42417	0.042416
9.4275	0.042523
9.43083	0.042639
9.43417	0.04276
9.4375	0.042894
9.44083	0.043041
9.44417	0.043194
9.4475	0.043329
9.45083	0.043451
9.45417	0.043564
9.4575	0.043672
9.46083	0.043773
9.46417	0.043874
9.4675	0.043989
9.47083	0.044114
9.47417	0.044233
9.4775	0.044329
9.48083	0.044404
9.48417	0.044467
9.4875	0.044515
9.49083	0.044554
9.49417	0.044591
9.4975	0.044621
9.50083	0.044641
9.50417	0.044649
9.5075	0.044647
9.51083	0.044639
9.51417	0.04463
9.5175	0.044621
9.52083	0.044602
9.52417	0.044561
9.5275	0.044506
9.53083	0.044449
9.53417	0.044391
9.5375	0.044318
9.54083	0.044234
9.54417	0.044143
9.5475	0.044042
9.55083	0.043918
9.55417	0.043775
9.5575	0.043625
9.56083	0.043478
9.56417	0.043329
9.5675	0.043171
9.57083	0.04301
9.57417	0.04285
9.5775	0.042699
9.58083	0.042549
9.58417	0.042394
9.5875	0.04223
9.59083	0.042054
9.59417	0.041874
9.5975	0.041692
9.60083	0.04151
9.60417	0.041328
9.6075	0.041147
9.61083	0.040972
9.61417	0.040792
9.6175	0.04061
9.62083	0.040428
9.62417	0.040256
9.6275	0.04009
9.63083	0.039919
9.63417	0.03974
9.6375	0.039552
9.64083	0.039361
9.64417	0.039167
9.6475	0.038983
9.65083	0.038819
9.65417	0.038668
9.6575	0.038529
9.66083	0.038401
9.66417	0.038294
9.6675	0.038205
9.67083	0.038124
9.67417	0.03806
9.6775	0.038015
9.68083	0.037975
9.68417	0.037925
9.6875	0.037869
9.69083	0.037819
9.69417	0.037775
9.6975	0.037735
9.70083	0.03771
9.70417	0.037716
9.7075	0.037749
9.71083	0.037804
9.71417	0.037876
9.7175	0.03796
9.72083	0.038054
9.72417	0.038156
9.7275	0.038264
9.73083	0.038372
9.73417	0.038479
9.7375	0.038593
9.74083	0.038722
9.74417	0.038865
9.7475	0.03902
9.75083	0.039184
9.75417	0.039363
9.7575	0.039554
9.76083	0.039746
9.76417	0.039934
9.7675	0.040127
9.77083	0.040334
9.77417	0.040553
9.7775	0.040773
9.78083	0.040996
9.78417	0.041236
9.7875	0.041495
9.79083	0.04177
9.79417	0.042065
9.7975	0.042384
9.80083	0.042726
9.80417	0.04307
9.8075	0.043405
9.81083	0.043728
9.81417	0.044044
9.8175	0.044359
9.82083	0.044673
9.82417	0.044995
9.8275	0.045335
9.83083	0.045687
9.83417	0.046052
9.8375	0.046411
9.84083	0.046765
9.84417	0.047123
9.8475	0.047493
9.85083	0.047873
9.85417	0.048253
9.8575	0.048646
[truncated: 17,442 more rows]

## Sheet: ΔsagA
Time (min)	Normalized absorbance
3.19917	0.086177
3.2025	0.082535
3.20583	0.079088
3.20917	0.075823
3.2125	0.072737
3.21583	0.06982
3.21917	0.067066
3.2225	0.064467
3.22583	0.062023
3.22917	0.059726
3.2325	0.057562
3.23583	0.055526
3.23917	0.053605
3.2425	0.0518
3.24583	0.050107
3.24917	0.048525
3.2525	0.047058
3.25583	0.045707
3.25917	0.044481
3.2625	0.043384
3.26583	0.042416
3.26917	0.041586
3.2725	0.040896
3.27583	0.040348
3.27917	0.03994
3.2825	0.03968
3.28583	0.039575
3.28917	0.03963
3.2925	0.039852
3.29583	0.040252
3.29917	0.040838
3.3025	0.041618
3.30583	0.042586
3.30917	0.043736
3.3125	0.045064
3.31583	0.04657
3.31917	0.048243
3.3225	0.050064
3.32583	0.052029
3.32917	0.054128
3.3325	0.056348
3.33583	0.058663
3.33917	0.06106
3.3425	0.063532
3.34583	0.066063
3.34917	0.068632
3.3525	0.071221
3.35583	0.073813
3.35917	0.076381
3.3625	0.0789
3.36583	0.081342
3.36917	0.08369
3.3725	0.085926
3.37583	0.088033
3.37917	0.090014
3.3825	0.091861
3.38583	0.093561
3.38917	0.095092
3.3925	0.096452
3.39583	0.09764
3.39917	0.098644
3.4025	0.099462
3.40583	0.100105
3.40917	0.100593
3.4125	0.100938
3.41583	0.101147
3.41917	0.101238
3.4225	0.101235
3.42583	0.101153
3.42917	0.101006
3.4325	0.100813
3.43583	0.10059
3.43917	0.100359
3.4425	0.100133
3.44583	0.099927
3.44917	0.099755
3.4525	0.099629
3.45583	0.099563
3.45917	0.099557
3.4625	0.0996
3.46583	0.099679
3.46917	0.09979
3.4725	0.099928
3.47583	0.10008
3.47917	0.100229
3.4825	0.100366
3.48583	0.100486
3.48917	0.100572
3.4925	0.100598
3.49583	0.100549
3.49917	0.100418
3.5025	0.1002
3.50583	0.099888
3.50917	0.09948
3.5125	0.098983
3.51583	0.098398
3.51917	0.097715
3.5225	0.096933
3.52583	0.09606
3.52917	0.095099
3.5325	0.094057
3.53583	0.092943
3.53917	0.09178
3.5425	0.090572
3.54583	0.089319
3.54917	0.088022
3.5525	0.086691
3.55583	0.085331
3.55917	0.083937
3.5625	0.082519
3.56583	0.08109
3.56917	0.079663
3.5725	0.078243
3.57583	0.076831
3.57917	0.075431
3.5825	0.074038
3.58583	0.07266
3.58917	0.071295
3.5925	0.069944
3.59583	0.068608
3.59917	0.067284
3.6025	0.065978
3.60583	0.064688
3.60917	0.063418
3.6125	0.062165
3.61583	0.060925
3.61917	0.059701
3.6225	0.058498
3.62583	0.057314
3.62917	0.056142
3.6325	0.054975
3.63583	0.053823
3.63917	0.052694
3.6425	0.051587
3.64583	0.050495
3.64917	0.049413
3.6525	0.048349
3.65583	0.0473
3.65917	0.046267
3.6625	0.045253
3.66583	0.044264
3.66917	0.043303
3.6725	0.042361
3.67583	0.04144
3.67917	0.040535
3.6825	0.039645
3.68583	0.038769
3.68917	0.037913
3.6925	0.037083
3.69583	0.036268
3.69917	0.035463
3.7025	0.034669
3.70583	0.033892
3.70917	0.03313
3.7125	0.03238
3.71583	0.031649
3.71917	0.030945
3.7225	0.030273
3.72583	0.029626
3.72917	0.029
3.7325	0.028399
3.73583	0.027825
3.73917	0.027282
3.7425	0.026768
3.74583	0.02629
3.74917	0.025857
3.7525	0.025474
3.75583	0.025141
3.75917	0.024858
3.7625	0.024628
3.76583	0.024448
3.76917	0.024318
3.7725	0.024239
3.77583	0.024213
3.77917	0.02424
3.7825	0.024319
3.78583	0.02445
3.78917	0.024637
3.7925	0.024883
3.79583	0.025187
3.79917	0.025544
3.8025	0.025946
3.80583	0.026382
3.80917	0.026843
3.8125	0.02732
3.81583	0.027811
3.81917	0.028313
3.8225	0.028816
3.82583	0.029313
3.82917	0.029803
3.8325	0.030284
3.83583	0.030749
3.83917	0.031184
3.8425	0.031589
3.84583	0.031964
3.84917	0.032307
3.8525	0.032613
3.85583	0.032876
3.85917	0.033098
3.8625	0.033279
3.86583	0.033424
3.86917	0.033529
3.8725	0.033602
3.87583	0.033649
3.87917	0.03367
3.8825	0.033668
3.88583	0.033651
3.88917	0.033629
3.8925	0.033596
3.89583	0.033553
3.89917	0.033509
3.9025	0.033476
3.90583	0.033452
3.90917	0.033434
3.9125	0.033425
3.91583	0.033424
3.91917	0.033434
3.9225	0.033457
3.92583	0.0335
3.92917	0.033569
3.9325	0.033662
3.93583	0.033778
3.93917	0.033913
3.9425	0.034066
3.94583	0.034234
3.94917	0.034419
3.9525	0.034617
3.95583	0.034832
3.95917	0.035063
3.9625	0.035317
3.96583	0.03559
3.96917	0.035876
3.9725	0.036181
3.97583	0.036507
3.97917	0.036853
3.9825	0.037202
3.98583	0.037553
3.98917	0.037906
3.9925	0.038265
3.99583	0.038629
3.99917	0.039003
4.0025	0.039392
4.00583	0.039793
4.00917	0.040198
4.0125	0.040598
4.01583	0.040992
4.01917	0.041379
4.0225	0.041757
4.02583	0.042128
4.02917	0.042496
4.0325	0.042865
4.03583	0.043231
4.03917	0.043589
4.0425	0.043946
4.04583	0.044306
4.04917	0.044663
4.0525	0.045008
4.05583	0.045343
4.05917	0.045671
4.0625	0.045995
4.06583	0.046309
4.06917	0.04662
4.0725	0.046933
4.07583	0.04725
4.07917	0.047568
4.0825	0.047881
4.08583	0.048194
4.08917	0.048503
4.0925	0.048813
4.09583	0.04912
4.09917	0.049429
4.1025	0.04974
4.10583	0.050054
4.10917	0.050373
4.1125	0.050698
4.11583	0.051032
4.11917	0.051372
4.1225	0.051719
4.12583	0.052074
4.12917	0.052446
4.1325	0.052839
4.13583	0.053253
4.13917	0.05368
4.1425	0.054123
4.14583	0.054587
4.14917	0.055074
4.1525	0.055576
4.15583	0.05609
4.15917	0.05662
4.1625	0.057172
4.16583	0.057739
4.16917	0.058316
4.1725	0.058903
4.17583	0.059502
4.17917	0.060111
4.1825	0.06073
4.18583	0.061358
4.18917	0.061991
4.1925	0.06263
4.19583	0.063276
4.19917	0.063925
4.2025	0.064569
4.20583	0.065204
4.20917	0.065829
4.2125	0.066441
4.21583	0.06704
4.21917	0.067619
4.2225	0.068175
4.22583	0.068709
4.22917	0.069223
4.2325	0.069717
4.23583	0.070189
4.23917	0.07064
4.2425	0.071066
4.24583	0.07146
4.24917	0.071815
4.2525	0.072133
4.25583	0.072413
4.25917	0.072658
4.2625	0.072878
4.26583	0.073081
4.26917	0.073258
4.2725	0.0734
4.27583	0.07351
4.27917	0.073591
4.2825	0.073645
4.28583	0.073664
4.28917	0.073651
4.2925	0.073614
4.29583	0.073561
4.29917	0.073487
4.3025	0.073383
4.30583	0.07325
4.30917	0.073103
4.3125	0.072942
4.31583	0.07276
4.31917	0.072563
4.3225	0.072359
4.32583	0.07215
4.32917	0.071931
4.3325	0.071703
4.33583	0.071472
4.33917	0.071237
4.3425	0.070993
4.34583	0.070745
4.34917	0.070496
4.3525	0.070244
4.35583	0.069987
4.35917	0.06972
4.3625	0.069449
4.36583	0.069174
4.36917	0.068894
4.3725	0.068608
4.37583	0.068325
4.37917	0.068054
4.3825	0.067793
4.38583	0.06754
4.38917	0.067295
4.3925	0.067062
4.39583	0.066843
4.39917	0.066639
4.4025	0.066458
4.40583	0.066302
4.40917	0.066177
4.4125	0.066093
4.41583	0.066058
4.41917	0.066077
4.4225	0.066156
4.42583	0.066317
4.42917	0.066589
4.4325	0.066999
4.43583	0.067577
4.43917	0.068363
4.4425	0.06942
4.44583	0.070833
4.44917	0.072687
4.4525	0.075069
4.45583	0.078071
4.45917	0.081786
4.4625	0.086296
4.46583	0.091653
4.46917	0.097893
4.4725	0.105046
4.47583	0.113113
4.47917	0.122072
4.4825	0.131881
4.48583	0.142479
4.48917	0.153799
4.4925	0.165754
4.49583	0.178263
4.49917	0.191235
4.5025	0.204575
4.50583	0.218187
4.50917	0.231973
4.5125	0.245833
4.51583	0.259665
4.51917	0.273369
4.5225	0.286866
4.52583	0.300084
4.52917	0.312961
4.5325	0.325435
4.53583	0.337459
4.53917	0.349013
4.5425	0.36006
4.54583	0.370562
4.54917	0.380498
4.5525	0.389863
4.55583	0.398665
4.55917	0.406882
4.5625	0.414517
4.56583	0.421587
4.56917	0.428107
4.5725	0.434078
4.57583	0.439483
4.57917	0.444325
4.5825	0.44863
4.58583	0.452417
4.58917	0.455693
4.5925	0.458467
4.59583	0.460771
4.59917	0.462641
4.6025	0.464097
4.60583	0.465137
4.60917	0.465774
4.6125	0.466033
4.61583	0.465934
4.61917	0.46549
4.6225	0.464704
4.62583	0.463592
4.62917	0.462174
4.6325	0.460471
4.63583	0.458509
4.63917	0.456297
4.6425	0.453848
4.64583	0.451184
4.64917	0.448319
4.6525	0.445265
4.65583	0.44202
4.65917	0.438605
4.6625	0.435036
4.66583	0.431313
4.66917	0.427442
4.6725	0.423434
4.67583	0.419295
4.67917	0.415028
4.6825	0.410642
4.68583	0.406157
4.68917	0.401585
4.6925	0.396928
4.69583	0.3922
4.69917	0.387396
4.7025	0.382534
4.70583	0.377624
4.70917	0.37268
4.7125	0.367702
4.71583	0.362686
4.71917	0.357641
4.7225	0.352569
4.72583	0.34747
4.72917	0.342346
4.7325	0.337207
4.73583	0.332067
4.73917	0.326933
4.7425	0.321805
4.74583	0.316682
4.74917	0.31157
4.7525	0.306469
4.75583	0.301384
4.75917	0.296326
4.7625	0.291296
4.76583	0.286286
4.76917	0.281282
4.7725	0.276291
4.77583	0.271327
4.77917	0.266388
4.7825	0.261474
4.78583	0.256592
4.78917	0.251755
4.7925	0.246955
4.79583	0.242174
4.79917	0.237415
4.8025	0.232689
4.80583	0.227994
4.80917	0.223338
4.8125	0.218724
4.81583	0.214159
4.81917	0.209638
4.8225	0.205156
4.82583	0.200725
4.82917	0.196348
4.8325	0.19203
4.83583	0.187768
4.83917	0.183559
4.8425	0.179411
4.84583	0.175315
4.84917	0.17127
4.8525	0.16728
4.85583	0.163355
4.85917	0.159509
4.8625	0.155741
4.86583	0.152043
4.86917	0.148409
4.8725	0.144838
4.87583	0.141328
4.87917	0.13787
4.8825	0.134465
4.88583	0.131119
4.88917	0.127838
4.8925	0.124621
4.89583	0.121475
4.89917	0.118406
4.9025	0.115416
4.90583	0.112504
4.90917	0.109666
4.9125	0.106897
4.91583	0.104192
4.91917	0.101546
4.9225	0.098954
4.92583	0.096422
4.92917	0.093951
4.9325	0.091545
4.93583	0.089203
4.93917	0.086916
4.9425	0.084688
4.94583	0.082521
4.94917	0.080417
4.9525	0.078376
4.95583	0.076401
4.95917	0.074493
4.9625	0.072654
4.96583	0.070882
4.96917	0.069174
4.9725	0.067529
4.97583	0.065942
4.97917	0.064411
4.9825	0.062936
4.98583	0.061518
4.98917	0.060152
4.9925	0.058838
4.99583	0.057577
4.99917	0.056373
5.0025	0.055223
5.00583	0.054128
5.00917	0.05309
5.0125	0.052111
5.01583	0.051195
5.01917	0.050332
5.0225	0.049517
5.02583	0.048741
5.02917	0.048006
5.0325	0.047313
5.03583	0.04666
5.03917	0.046049
5.0425	0.045488
5.04583	0.044975
5.04917	0.044494
5.0525	0.044035
5.05583	0.043604
5.05917	0.043198
5.0625	0.042809
5.06583	0.042435
5.06917	0.042088
5.0725	0.04177
5.07583	0.041474
5.07917	0.04119
5.0825	0.040917
5.08583	0.04065
5.08917	0.040382
5.0925	0.040112
5.09583	0.039831
5.09917	0.039545
5.1025	0.039255
5.10583	0.038964
5.10917	0.038671
5.1125	0.038376
5.11583	0.038084
5.11917	0.037789
5.1225	0.037489
5.12583	0.037185
5.12917	0.036883
5.1325	0.036572
5.13583	0.036251
5.13917	0.035921
5.1425	0.035587
5.14583	0.03525
5.14917	0.034903
5.1525	0.034551
5.15583	0.034194
5.15917	0.033837
5.1625	0.033485
5.16583	0.033136
5.16917	0.032794
5.1725	0.032454
5.17583	0.03212
5.17917	0.031792
5.1825	0.031465
5.18583	0.031143
5.18917	0.030831
5.1925	0.030533
5.19583	0.030253
5.19917	0.029989
5.2025	0.029738
5.20583	0.029501
5.20917	0.029275
5.2125	0.029056
5.21583	0.028848
5.21917	0.028655
5.2225	0.028483
5.22583	0.028333
5.22917	0.028205
5.2325	0.0281
5.23583	0.028009
5.23917	0.027929
5.2425	0.027858
5.24583	0.027795
5.24917	0.027742
5.2525	0.027697
5.25583	0.027669
5.25917	0.02766
5.2625	0.027662
5.26583	0.027671
5.26917	0.027688
5.2725	0.027721
5.27583	0.02776
5.27917	0.027802
5.2825	0.027847
5.28583	0.027893
5.28917	0.027935
5.2925	0.027967
5.29583	0.027998
5.29917	0.028028
5.3025	0.028056
5.30583	0.028077
5.30917	0.028092
5.3125	0.028105
5.31583	0.028109
5.31917	0.028109
5.3225	0.028109
5.32583	0.028115
5.32917	0.02812
5.3325	0.028111
5.33583	0.028088
5.33917	0.028048
5.3425	0.027999
5.34583	0.027943
5.34917	0.027888
5.3525	0.027836
5.35583	0.027789
5.35917	0.027751
5.3625	0.027712
5.36583	0.027669
5.36917	0.027627
5.3725	0.027592
5.37583	0.027565
5.37917	0.027545
5.3825	0.027529
5.38583	0.027511
5.38917	0.027489
5.3925	0.027462
5.39583	0.027438
5.39917	0.027417
5.4025	0.0274
5.40583	0.027387
5.40917	0.027374
5.4125	0.027358
5.41583	0.027334
5.41917	0.027311
5.4225	0.027297
5.42583	0.027294
5.42917	0.027306
5.4325	0.027328
5.43583	0.027361
5.43917	0.027395
5.4425	0.027423
5.44583	0.027443
5.44917	0.027466
5.4525	0.027495
5.45583	0.027529
5.45917	0.027566
5.4625	0.027613
5.46583	0.027669
5.46917	0.027728
5.4725	0.027783
5.47583	0.027836
5.47917	0.027887
5.4825	0.027935
5.48583	0.02798
5.48917	0.028028
5.4925	0.028078
5.49583	0.028132
5.49917	0.028186
5.5025	0.028237
5.50583	0.028282
5.50917	0.028318
5.5125	0.02835
5.51583	0.028379
5.51917	0.028407
5.5225	0.028425
5.52583	0.02843
5.52917	0.028427
5.5325	0.028414
5.53583	0.028394
5.53917	0.028367
5.5425	0.028335
5.54583	0.028298
5.54917	0.02825
5.5525	0.028187
5.55583	0.028109
5.55917	0.02801
5.5625	0.027895
5.56583	0.027769
5.56917	0.027633
5.5725	0.02749
5.57583	0.027334
5.57917	0.027169
5.5825	0.026995
5.58583	0.026814
5.58917	0.026629
5.5925	0.026433
5.59583	0.026223
5.59917	0.026007
5.6025	0.02579
5.60583	0.025574
5.60917	0.025347
5.6125	0.025112
5.61583	0.02488
5.61917	0.024654
5.6225	0.024431
5.62583	0.024205
5.62917	0.023985
5.6325	0.023774
5.63583	0.023567
5.63917	0.023359
5.6425	0.023145
5.64583	0.022929
5.64917	0.022717
5.6525	0.022515
5.65583	0.022321
5.65917	0.022129
5.6625	0.021941
5.66583	0.021757
5.66917	0.021582
5.6725	0.021406
5.67583	0.021233
5.67917	0.02107
5.6825	0.020924
5.68583	0.020795
5.68917	0.020679
5.6925	0.020579
5.69583	0.020489
5.69917	0.020405
5.7025	0.020335
5.70583	0.020283
5.70917	0.020252
5.7125	0.020241
5.71583	0.020252
5.71917	0.020281
5.7225	0.020325
5.72583	0.020378
5.72917	0.020439
5.7325	0.020513
5.73583	0.020606
5.73917	0.020729
5.7425	0.020879
5.74583	0.021057
5.74917	0.021256
5.7525	0.021474
5.75583	0.021706
5.75917	0.02195
5.7625	0.022208
5.76583	0.022478
5.76917	0.022756
5.7725	0.023049
5.77583	0.023357
5.77917	0.023671
5.7825	0.023981
5.78583	0.024297
5.78917	0.024628
5.7925	0.024972
5.79583	0.025323
5.79917	0.025679
5.8025	0.02605
5.80583	0.026433
5.80917	0.026815
5.8125	0.027195
5.81583	0.02757
5.81917	0.027946
5.8225	0.028321
5.82583	0.028692
5.82917	0.029067
5.8325	0.029451
5.83583	0.029848
5.83917	0.030252
5.8425	0.030668
5.84583	0.031094
5.84917	0.031524
5.8525	0.031966
5.85583	0.032424
5.85917	0.032907
5.8625	0.033406
5.86583	0.033925
5.86917	0.03447
5.8725	0.035043
5.87583	0.035642
5.87917	0.036257
5.8825	0.036888
5.88583	0.037543
5.88917	0.038225
5.8925	0.038931
5.89583	0.039661
5.89917	0.040423
5.9025	0.041223
5.90583	0.042054
5.90917	0.042916
5.9125	0.043805
5.91583	0.044711
5.91917	0.045628
5.9225	0.046553
5.92583	0.047483
5.92917	0.048417
5.9325	0.049349
5.93583	0.050282
5.93917	0.051216
5.9425	0.052148
5.94583	0.05307
5.94917	0.053973
5.9525	0.05486
5.95583	0.055731
5.95917	0.056582
5.9625	0.057406
5.96583	0.0582
5.96917	0.058957
5.9725	0.059675
5.97583	0.060345
5.97917	0.060965
5.9825	0.06154
5.98583	0.062073
5.98917	0.062566
5.9925	0.063015
5.99583	0.063413
5.99917	0.063764
6.0025	0.064068
6.00583	0.06432
6.00917	0.064515
6.0125	0.064657
6.01583	0.064754
6.01917	0.064812
6.0225	0.064829
6.02583	0.064801
6.02917	0.064728
6.0325	0.064609
6.03583	0.064442
6.03917	0.064224
6.0425	0.063952
6.04583	0.063638
6.04917	0.063289
6.0525	0.062905
6.05583	0.062485
6.05917	0.062032
6.0625	0.061544
6.06583	0.061019
6.06917	0.060453
6.0725	0.059855
6.07583	0.059223
6.07917	0.058559
6.0825	0.057873
6.08583	0.057178
6.08917	0.056475
6.0925	0.055759
6.09583	0.055029
6.09917	0.054289
6.1025	0.053536
6.10583	0.052762
6.10917	0.05197
6.1125	0.051171
6.11583	0.050374
6.11917	0.049578
6.1225	0.048786
6.12583	0.048
6.12917	0.047226
6.1325	0.046455
6.13583	0.045683
6.13917	0.044915
6.1425	0.044154
6.14583	0.043399
6.14917	0.042644
6.1525	0.041895
6.15583	0.041159
6.15917	0.040449
6.1625	0.039761
6.16583	0.039099
6.16917	0.038463
6.1725	0.037857
6.17583	0.037281
6.17917	0.036724
6.1825	0.036191
6.18583	0.035688
6.18917	0.035217
6.1925	0.034781
6.19583	0.034382
6.19917	0.034024
6.2025	0.033715
6.20583	0.033455
6.20917	0.03325
6.2125	0.033099
6.21583	0.03301
6.21917	0.032988
6.2225	0.033035
6.22583	0.033156
6.22917	0.033358
6.2325	0.033647
6.23583	0.034024
6.23917	0.034488
6.2425	0.035038
6.24583	0.035669
6.24917	0.036384
6.2525	0.037197
6.25583	0.038118
6.25917	0.039152
6.2625	0.040299
6.26583	0.041569
6.26917	0.042963
6.2725	0.04448
6.27583	0.046113
6.27917	0.047858
6.2825	0.049721
6.28583	0.0517
6.28917	0.053789
6.2925	0.055983
6.29583	0.05828
6.29917	0.060679
6.3025	0.063168
6.30583	0.065748
6.30917	0.068411
6.3125	0.071153
6.31583	0.073956
6.31917	0.076806
6.3225	0.079696
6.32583	0.08262
6.32917	0.085572
6.3325	0.088533
6.33583	0.091493
6.33917	0.094438
6.3425	0.097362
6.34583	0.100248
6.34917	0.103074
6.3525	0.105829
6.35583	0.108521
6.35917	0.111154
6.3625	0.113714
6.36583	0.11619
6.36917	0.118572
6.3725	0.120856
6.37583	0.123021
6.37917	0.125053
6.3825	0.126944
6.38583	0.128699
6.38917	0.130317
6.3925	0.131792
6.39583	0.133117
6.39917	0.134289
6.4025	0.135305
6.40583	0.13617
6.40917	0.136885
6.4125	0.137458
6.41583	0.137887
6.41917	0.138176
6.4225	0.138324
6.42583	0.138323
6.42917	0.13817
6.4325	0.137873
6.43583	0.137447
6.43917	0.136898
6.4425	0.136224
6.44583	0.135428
6.44917	0.134518
6.4525	0.133497
6.45583	0.132363
6.45917	0.131119
6.4625	0.129781
6.46583	0.128353
6.46917	0.126833
6.4725	0.12523
6.47583	0.123551
6.47917	0.12181
6.4825	0.120009
6.48583	0.118153
6.48917	0.116244
6.4925	0.114282
6.49583	0.112275
6.49917	0.110224
6.5025	0.108134
6.50583	0.106016
6.50917	0.103881
6.5125	0.101736
6.51583	0.099574
6.51917	0.097404
6.5225	0.095229
6.52583	0.093043
6.52917	0.090847
6.5325	0.088641
6.53583	0.086437
6.53917	0.08424
6.5425	0.082058
6.54583	0.079896
6.54917	0.077754
6.5525	0.075633
6.55583	0.073534
6.55917	0.071457
6.5625	0.069397
6.56583	0.067364
6.56917	0.065363
6.5725	0.063404
6.57583	0.06148
6.57917	0.059586
6.5825	0.057723
6.58583	0.055892
6.58917	0.054091
6.5925	0.052322
6.59583	0.050586
6.59917	0.048891
6.6025	0.047237
6.60583	0.045628
6.60917	0.044065
6.6125	0.042547
6.61583	0.041074
6.61917	0.039649
6.6225	0.038269
6.62583	0.036931
6.62917	0.035629
6.6325	0.034363
6.63583	0.033138
6.63917	0.031954
6.6425	0.030809
6.64583	0.029702
6.64917	0.02864
6.6525	0.027626
6.65583	0.026656
6.65917	0.025729
6.6625	0.024837
6.66583	0.02398
6.66917	0.023161
6.6725	0.022378
6.67583	0.02163
6.67917	0.020914
6.6825	0.020237
6.68583	0.0196
6.68917	0.018997
6.6925	0.01842
6.69583	0.017866
6.69917	0.017333
6.7025	0.016826
6.70583	0.016346
6.70917	0.015896
6.7125	0.015474
6.71583	0.01508
6.71917	0.014717
6.7225	0.014379
6.72583	0.014064
6.72917	0.013774
6.7325	0.013507
6.73583	0.013262
6.73917	0.013034
6.7425	0.012823
6.74583	0.012626
6.74917	0.012441
6.7525	0.012275
6.75583	0.012129
6.75917	0.012002
6.7625	0.011893
6.76583	0.011808
6.76917	0.011743
6.7725	0.011696
6.77583	0.011653
6.77917	0.011612
6.7825	0.011578
6.78583	0.011553
6.78917	0.011538
6.7925	0.011531
6.79583	0.011545
6.79917	0.011586
6.8025	0.011645
6.80583	0.01171
6.80917	0.011773
6.8125	0.011835
6.81583	0.011895
6.81917	0.011949
6.8225	0.012005
6.82583	0.012067
6.82917	0.012139
6.8325	0.012219
6.83583	0.01231
6.83917	0.012412
6.8425	0.012511
6.84583	0.012601
6.84917	0.012681
6.8525	0.012757
6.85583	0.012826
6.85917	0.012886
6.8625	0.012943
6.86583	0.013006
6.86917	0.013071
6.8725	0.013131
6.87583	0.013188
6.87917	0.01324
6.8825	0.013282
6.88583	0.013315
6.88917	0.013341
6.8925	0.013363
6.89583	0.013379
6.89917	0.013387
6.9025	0.01339
6.90583	0.01339
6.90917	0.013388
6.9125	0.013382
6.91583	0.013371
6.91917	0.013357
6.9225	0.013335
6.92583	0.013302
6.92917	0.013261
6.9325	0.013219
6.93583	0.013176
6.93917	0.013127
6.9425	0.013076
6.94583	0.013027
6.94917	0.012979
6.9525	0.01293
6.95583	0.012878
6.95917	0.012825
6.9625	0.012781
6.96583	0.012744
6.96917	0.012711
6.9725	0.012678
6.97583	0.012649
6.97917	0.012631
6.9825	0.012615
6.98583	0.012603
6.98917	0.012595
6.9925	0.012597
6.99583	0.012608
6.99917	0.012622
7.0025	0.012639
7.00583	0.012665
7.00917	0.012695
7.0125	0.012728
7.01583	0.012762
7.01917	0.0128
7.0225	0.012845
7.02583	0.012891
7.02917	0.012942
7.0325	0.012997
7.03583	0.013054
7.03917	0.013115
7.0425	0.013178
7.04583	0.013255
7.04917	0.013337
7.0525	0.013418
7.05583	0.0135
7.05917	0.013582
7.0625	0.013663
7.06583	0.013734
7.06917	0.013797
7.0725	0.013864
7.07583	0.013936
7.07917	0.014005
7.0825	0.014074
7.08583	0.014143
7.08917	0.014208
7.0925	0.014263
7.09583	0.014318
7.09917	0.014387
7.1025	0.01447
7.10583	0.014561
7.10917	0.014661
7.1125	0.014769
7.11583	0.014878
7.11917	0.014984
7.1225	0.015091
7.12583	0.015204
7.12917	0.01533
7.1325	0.015466
7.13583	0.015611
7.13917	0.015762
7.1425	0.015925
7.14583	0.016096
7.14917	0.016278
7.1525	0.016473
7.15583	0.016684
7.15917	0.016912
7.1625	0.01716
7.16583	0.017431
7.16917	0.017723
7.1725	0.018039
7.17583	0.018376
7.17917	0.018733
7.1825	0.019103
7.18583	0.019481
7.18917	0.019872
7.1925	0.020276
7.19583	0.020691
7.19917	0.021116
7.2025	0.021559
7.20583	0.022026
7.20917	0.022513
7.2125	0.023013
7.21583	0.023531
7.21917	0.024071
7.2225	0.024628
7.22583	0.025196
7.22917	0.025775
7.2325	0.026367
7.23583	0.026969
7.23917	0.027575
7.2425	0.028184
7.24583	0.028797
7.24917	0.029418
7.2525	0.030046
7.25583	0.030678
7.25917	0.031312
7.2625	0.031946
7.26583	0.032572
7.26917	0.033187
7.2725	0.033791
7.27583	0.034388
7.27917	0.03498
7.2825	0.035564
7.28583	0.036139
7.28917	0.036702
7.2925	0.03725
7.29583	0.037781
7.29917	0.038292
7.3025	0.038782
7.30583	0.039246
7.30917	0.039689
7.3125	0.040114
7.31583	0.04052
7.31917	0.040908
7.3225	0.041278
7.32583	0.041626
7.32917	0.04195
7.3325	0.042251
7.33583	0.042529
7.33917	0.042782
7.3425	0.043008
7.34583	0.043213
7.34917	0.043401
7.3525	0.043567
7.35583	0.043705
7.35917	0.043815
7.3625	0.043902
7.36583	0.043961
7.36917	0.04399
7.3725	0.043996
7.37583	0.043983
7.37917	0.043943
7.3825	0.043869
7.38583	0.04377
7.38917	0.043649
7.3925	0.043502
7.39583	0.043324
7.39917	0.043119
7.4025	0.0429
7.40583	0.042664
7.40917	0.042412
7.4125	0.042142
7.41583	0.041858
7.41917	0.041559
7.4225	0.041241
7.42583	0.040906
7.42917	0.04055
7.4325	0.040179
7.43583	0.03979
7.43917	0.039389
7.4425	0.038981
7.44583	0.03856
7.44917	0.038122
7.4525	0.037665
7.45583	0.037199
7.45917	0.036728
7.4625	0.036246
7.46583	0.035755
7.46917	0.035261
7.4725	0.034769
7.47583	0.034271
7.47917	0.033758
7.4825	0.033237
7.48583	0.03271
7.48917	0.032181
7.4925	0.03165
7.49583	0.031124
7.49917	0.030605
7.5025	0.030091
7.50583	0.029583
7.50917	0.029077
7.5125	0.028575
7.51583	0.028078
7.51917	0.027584
7.5225	0.027094
7.52583	0.026604
7.52917	0.026118
7.5325	0.02564
7.53583	0.025171
7.53917	0.024708
7.5425	0.024255
7.54583	0.023821
7.54917	0.023403
7.5525	0.022999
7.55583	0.022609
7.55917	0.022241
7.5625	0.021894
7.56583	0.021564
7.56917	0.02125
7.5725	0.020958
7.57583	0.020685
7.57917	0.020433
7.5825	0.0202
7.58583	0.019989
7.58917	0.0198
7.5925	0.019635
7.59583	0.019498
7.59917	0.019391
7.6025	0.019313
7.60583	0.019268
7.60917	0.019251
7.6125	0.019258
7.61583	0.019284
7.61917	0.01933
7.6225	0.019409
7.62583	0.019517
7.62917	0.019658
7.6325	0.019828
7.63583	0.020029
7.63917	0.020259
7.6425	0.020515
7.64583	0.020804
7.64917	0.021123
7.6525	0.021479
7.65583	0.021877
7.65917	0.022313
7.6625	0.022783
7.66583	0.023282
7.66917	0.023816
7.6725	0.024384
7.67583	0.024982
7.67917	0.025614
7.6825	0.026286
7.68583	0.026995
7.68917	0.027734
7.6925	0.0285
7.69583	0.029292
7.69917	0.030112
7.7025	0.030957
7.70583	0.031835
7.70917	0.03274
7.7125	0.033673
7.71583	0.034634
7.71917	0.035625
7.7225	0.036637
7.72583	0.037667
7.72917	0.038716
7.7325	0.039785
7.73583	0.040873
7.73917	0.041971
7.7425	0.043076
7.74583	0.044178
7.74917	0.045276
7.7525	0.04637
7.75583	0.047458
7.75917	0.048548
7.7625	0.049636
7.76583	0.050716
7.76917	0.051779
7.7725	0.052815
7.77583	0.053819
7.77917	0.05479
7.7825	0.055729
7.78583	0.056639
7.78917	0.057512
7.7925	0.058354
7.79583	0.059163
7.79917	0.059925
7.8025	0.060631
7.80583	0.061277
7.80917	0.061874
7.8125	0.062418
7.81583	0.062905
7.81917	0.06333
7.8225	0.063693
7.82583	0.063989
7.82917	0.064213
7.8325	0.064366
7.83583	0.06445
7.83917	0.064475
7.8425	0.064448
7.84583	0.064368
7.84917	0.064234
7.8525	0.064045
7.85583	0.063805
7.85917	0.063506
7.8625	0.063152
7.86583	0.062746
7.86917	0.062293
7.8725	0.061794
7.87583	0.061249
7.87917	0.060661
7.8825	0.060021
7.88583	0.059337
7.88917	0.058618
7.8925	0.05787
7.89583	0.057092
7.89917	0.056286
7.9025	0.055461
7.90583	0.05462
7.90917	0.053762
7.9125	0.05288
7.91583	0.051981
7.91917	0.051068
7.9225	0.050148
7.92583	0.049219
7.92917	0.048283
7.9325	0.047341
7.93583	0.0464
7.93917	0.045459
7.9425	0.044512
7.94583	0.043566
7.94917	0.042628
7.9525	0.041701
7.95583	0.040779
7.95917	0.039865
7.9625	0.038962
7.96583	0.038074
7.96917	0.037191
7.9725	0.036313
7.97583	0.035444
7.97917	0.034595
7.9825	0.033766
7.98583	0.032953
7.98917	0.032157
7.9925	0.03138
7.99583	0.030629
7.99917	0.029897
8.0025	0.029172
8.00583	0.028454
8.00917	0.027752
8.0125	0.027068
8.01583	0.026399
8.01917	0.02575
8.0225	0.025124
8.02583	0.02452
8.02917	0.023931
8.0325	0.023358
8.03583	0.022801
8.03917	0.02226
8.0425	0.02174
8.04583	0.021249
8.04917	0.020785
8.0525	0.020336
8.05583	0.019893
8.05917	0.019463
8.0625	0.019047
8.06583	0.018648
8.06917	0.018269
8.0725	0.01791
8.07583	0.017575
8.07917	0.017262
8.0825	0.016976
8.08583	0.016707
8.08917	0.016456
8.0925	0.016226
8.09583	0.016015
8.09917	0.015823
8.1025	0.015645
8.10583	0.015488
8.10917	0.015349
8.1125	0.015229
8.11583	0.015131
8.11917	0.015058
8.1225	0.015012
8.12583	0.014987
8.12917	0.014986
8.1325	0.015009
8.13583	0.015053
8.13917	0.015115
8.1425	0.015194
8.14583	0.015294
8.14917	0.015416
8.1525	0.015561
8.15583	0.015733
8.15917	0.015932
8.1625	0.016154
8.16583	0.016395
8.16917	0.016653
8.1725	0.016926
8.17583	0.017219
8.17917	0.017523
8.1825	0.017833
8.18583	0.018157
8.18917	0.018505
8.1925	0.018871
8.19583	0.019244
8.19917	0.01962
8.2025	0.019999
8.20583	0.020381
8.20917	0.020757
8.2125	0.02113
8.21583	0.02151
8.21917	0.021896
8.2225	0.022282
8.22583	0.022662
8.22917	0.023038
8.2325	0.023407
8.23583	0.023768
8.23917	0.024122
8.2425	0.024474
8.24583	0.024823
8.24917	0.025167
8.2525	0.025503
8.25583	0.02583
8.25917	0.026146
8.2625	0.026451
8.26583	0.026744
8.26917	0.027024
8.2725	0.027293
8.27583	0.02755
8.27917	0.027796
8.2825	0.028029
8.28583	0.028252
8.28917	0.028467
8.2925	0.028672
8.29583	0.028862
8.29917	0.029034
8.3025	0.029192
8.30583	0.029334
8.30917	0.029459
8.3125	0.029566
8.31583	0.029666
8.31917	0.029762
8.3225	0.029855
8.32583	0.029943
8.32917	0.030019
8.3325	0.03008
8.33583	0.030124
8.33917	0.030157
8.3425	0.030183
8.34583	0.030203
8.34917	0.03022
8.3525	0.030231
8.35583	0.030232
8.35917	0.030221
8.3625	0.030194
8.36583	0.030148
8.36917	0.030091
8.3725	0.030028
8.37583	0.029959
8.37917	0.029878
8.3825	0.029789
8.38583	0.029692
8.38917	0.029584
8.3925	0.029464
8.39583	0.029335
8.39917	0.0292
8.4025	0.029057
8.40583	0.028903
8.40917	0.028741
8.4125	0.028572
8.41583	0.028394
8.41917	0.028208
8.4225	0.028014
8.42583	0.027817
8.42917	0.027617
8.4325	0.02741
8.43583	0.027196
8.43917	0.026974
8.4425	0.026756
8.44583	0.026534
8.44917	0.026305
8.4525	0.026064
8.45583	0.025816
8.45917	0.025566
8.4625	0.025309
8.46583	0.025049
8.46917	0.024793
8.4725	0.02455
8.47583	0.024318
8.47917	0.024084
8.4825	0.02384
8.48583	0.023592
8.48917	0.023351
8.4925	0.02311
8.49583	0.022869
8.49917	0.022633
8.5025	0.02241
8.50583	0.022195
8.50917	0.021983
8.5125	0.021779
8.51583	0.021593
8.51917	0.021423
8.5225	0.021265
8.52583	0.021116
8.52917	0.020979
8.5325	0.020859
8.53583	0.02076
8.53917	0.020688
8.5425	0.020646
8.54583	0.02064
8.54917	0.020672
8.5525	0.020747
8.55583	0.020869
8.55917	0.021045
8.5625	0.021284
8.56583	0.021592
8.56917	0.021976
8.5725	0.022446
8.57583	0.023011
8.57917	0.023683
8.5825	0.024467
8.58583	0.025378
8.58917	0.026432
8.5925	0.027638
8.59583	0.028993
8.59917	0.030495
8.6025	0.032153
8.60583	0.033971
8.60917	0.035944
8.6125	0.038063
8.61583	0.04033
8.61917	0.042741
8.6225	0.045285
8.62583	0.047941
8.62917	0.050685
8.6325	0.053506
8.63583	0.056388
8.63917	0.059317
8.6425	0.06228
8.64583	0.065263
8.64917	0.068255
8.6525	0.071244
8.65583	0.074221
8.65917	0.077173
8.6625	0.080087
8.66583	0.08295
8.66917	0.085755
8.6725	0.088494
8.67583	0.091156
8.67917	0.093734
8.6825	0.09622
8.68583	0.098615
8.68917	0.100911
8.6925	0.103098
8.69583	0.105167
8.69917	0.107123
8.7025	0.10897
8.70583	0.110699
8.70917	0.112305
8.7125	0.113804
8.71583	0.115204
8.71917	0.1165
8.7225	0.117686
8.72583	0.11877
8.72917	0.11976
8.7325	0.120648
8.73583	0.121429
8.73917	0.122109
8.7425	0.122697
8.74583	0.123193
8.74917	0.123598
8.7525	0.123914
8.75583	0.124145
8.75917	0.124287
8.7625	0.124347
8.76583	0.124329
8.76917	0.124243
8.7725	0.124092
8.77583	0.123886
8.77917	0.123633
8.7825	0.123326
8.78583	0.122957
8.78917	0.122522
8.7925	0.122029
8.79583	0.12148
8.79917	0.120876
8.8025	0.120231
8.80583	0.119556
8.80917	0.118858
8.8125	0.118129
8.81583	0.117365
8.81917	0.116574
8.8225	0.115756
8.82583	0.114914
8.82917	0.114046
8.8325	0.113158
8.83583	0.112251
8.83917	0.111322
8.8425	0.110375
8.84583	0.109406
8.84917	0.108418
8.8525	0.107414
8.85583	0.106403
8.85917	0.105381
8.8625	0.104348
8.86583	0.103301
8.86917	0.102247
8.8725	0.101187
8.87583	0.100117
8.87917	0.099037
8.8825	0.097948
8.88583	0.096859
8.88917	0.095774
8.8925	0.094693
8.89583	0.093612
8.89917	0.092533
8.9025	0.091461
8.90583	0.090389
8.90917	0.08932
8.9125	0.088256
8.91583	0.087198
8.91917	0.086144
8.9225	0.085091
8.92583	0.084048
8.92917	0.083012
8.9325	0.081982
8.93583	0.080954
8.93917	0.079937
8.9425	0.078931
8.94583	0.077931
8.94917	0.076931
8.9525	0.075935
8.95583	0.074953
8.95917	0.073986
8.9625	0.073024
8.96583	0.072072
8.96917	0.071134
8.9725	0.070208
8.97583	0.06929
8.97917	0.068376
8.9825	0.067473
8.98583	0.066574
8.98917	0.065679
8.9925	0.064796
8.99583	0.063929
8.99917	0.063075
9.0025	0.062234
9.00583	0.061408
9.00917	0.060602
9.0125	0.059806
9.01583	0.059015
9.01917	0.058234
9.0225	0.057462
9.02583	0.056697
9.02917	0.055938
9.0325	0.055192
9.03583	0.054464
9.03917	0.053746
9.0425	0.053039
9.04583	0.052341
9.04917	0.05165
9.0525	0.050961
9.05583	0.050272
9.05917	0.049591
9.0625	0.048922
9.06583	0.048273
9.06917	0.047646
9.0725	0.047034
9.07583	0.046435
9.07917	0.045848
9.0825	0.045284
9.08583	0.044738
9.08917	0.044203
9.0925	0.04368
9.09583	0.043177
9.09917	0.042697
9.1025	0.042234
9.10583	0.041786
9.10917	0.041363
9.1125	0.040968
9.11583	0.040598
9.11917	0.040251
9.1225	0.039921
9.12583	0.03961
9.12917	0.039312
9.1325	0.039029
9.13583	0.038771
9.13917	0.038543
9.1425	0.038345
9.14583	0.038176
9.14917	0.038044
9.1525	0.037946
9.15583	0.037874
9.15917	0.037821
9.1625	0.037792
9.16583	0.037786
9.16917	0.037803
9.1725	0.037841
9.17583	0.0379
9.17917	0.037983
9.1825	0.038083
9.18583	0.038199
9.18917	0.038336
9.1925	0.038496
9.19583	0.038675
9.19917	0.038872
9.2025	0.039087
9.20583	0.039319
9.20917	0.039554
9.2125	0.03979
9.21583	0.040031
9.21917	0.040286
9.2225	0.040552
9.22583	0.040828
9.22917	0.041115
9.2325	0.04141
9.23583	0.041705
9.23917	0.041989
9.2425	0.042265
9.24583	0.042535
9.24917	0.042801
9.2525	0.043057
9.25583	0.043303
9.25917	0.043543
9.2625	0.043775
9.26583	0.044002
9.26917	0.04422
9.2725	0.04443
9.27583	0.04463
9.27917	0.04482
9.2825	0.044994
9.28583	0.045148
9.28917	0.045286
9.2925	0.045418
9.29583	0.045542
9.29917	0.045646
9.3025	0.045731
9.30583	0.045798
9.30917	0.045845
9.3125	0.045868
9.31583	0.04587
9.31917	0.045864
9.3225	0.04585
9.32583	0.045824
9.32917	0.045779
9.3325	0.045712
9.33583	0.045624
9.33917	0.045522
9.3425	0.045405
9.34583	0.045272
9.34917	0.045126
9.3525	0.044976
9.35583	0.044818
9.35917	0.044637
9.3625	0.044436
9.36583	0.044227
9.36917	0.044011
9.3725	0.043784
9.37583	0.043549
9.37917	0.043306
9.3825	0.043054
9.38583	0.042788
9.38917	0.04251
9.3925	0.042224
9.39583	0.041928
9.39917	0.041626
9.4025	0.041317
9.40583	0.040999
9.40917	0.040664
9.4125	0.040312
9.41583	0.039955
9.41917	0.039597
9.4225	0.039244
9.42583	0.038888
9.42917	0.038533
9.4325	0.038183
9.43583	0.037838
9.43917	0.03749
9.4425	0.037131
9.44583	0.036772
9.44917	0.036414
9.4525	0.036054
9.45583	0.035684
9.45917	0.035307
9.4625	0.034931
9.46583	0.034555
9.46917	0.03418
9.4725	0.033806
9.47583	0.033432
9.47917	0.033057
9.4825	0.032681
9.48583	0.032308
9.48917	0.031939
9.4925	0.03157
9.49583	0.031207
9.49917	0.030856
9.5025	0.030516
9.50583	0.03018
9.50917	0.029851
9.5125	0.02953
9.51583	0.029213
9.51917	0.028896
9.5225	0.028581
9.52583	0.028272
9.52917	0.027963
9.5325	0.027655
9.53583	0.027358
9.53917	0.027081
9.5425	0.02682
9.54583	0.026576
9.54917	0.026356
9.5525	0.026152
9.55583	0.02595
9.55917	0.02574
9.5625	0.025535
9.56583	0.025334
9.56917	0.025136
9.5725	0.024951
9.57583	0.024788
9.57917	0.024645
9.5825	0.024506
9.58583	0.024371
9.58917	0.024247
9.5925	0.024131
9.59583	0.024022
9.59917	0.023929
9.6025	0.023861
9.60583	0.023816
9.60917	0.023793
9.6125	0.02379
9.61583	0.023803
9.61917	0.023827
9.6225	0.023865
9.62583	0.023918
9.62917	0.02398
9.6325	0.024048
9.63583	0.024129
9.63917	0.02423
9.6425	0.024351
9.64583	0.024491
9.64917	0.024647
9.6525	0.02482
9.65583	0.025009
9.65917	0.025219
9.6625	0.025444
9.66583	0.025685
9.66917	0.025948
9.6725	0.026233
9.67583	0.026537
9.67917	0.026848
9.6825	0.027172
9.68583	0.027513
9.68917	0.027871
9.6925	0.028243
9.69583	0.028628
9.69917	0.029027
9.7025	0.029432
9.70583	0.029844
9.70917	0.030261
9.7125	0.030691
9.71583	0.031135
9.71917	0.031588
9.7225	0.032053
9.72583	0.032524
9.72917	0.033001
9.7325	0.033478
9.73583	0.033962
9.73917	0.034456
9.7425	0.034955
9.74583	0.035455
9.74917	0.035954
9.7525	0.036453
9.75583	0.036944
9.75917	0.037423
9.7625	0.037899
9.76583	0.038375
9.76917	0.038855
9.7725	0.039326
9.77583	0.039788
9.77917	0.040243
9.7825	0.040689
9.78583	0.041123
9.78917	0.041545
9.7925	0.041962
9.79583	0.042374
9.79917	0.042781
9.8025	0.043177
9.80583	0.043557
9.80917	0.043923
9.8125	0.044273
9.81583	0.044608
9.81917	0.044929
9.8225	0.045245
9.82583	0.045552
9.82917	0.045847
9.8325	0.046133
9.83583	0.046407
9.83917	0.046666
9.8425	0.046897
9.84583	0.047102
9.84917	0.047286
9.8525	0.047454
9.85583	0.047614
9.85917	0.047763
[truncated: 17,442 more rows]

## Sheet: ΔsagA - psagA
Time (min)	Normalized absorbance
3.19833	0.115296
3.20167	0.111051
3.205	0.106979
3.20833	0.103091
3.21167	0.099387
3.215	0.09587
3.21833	0.092531
3.22167	0.08937
3.225	0.086396
3.22833	0.083605
3.23167	0.08099
3.235	0.078539
3.23833	0.076238
3.24167	0.074079
3.245	0.072051
3.24833	0.070158
3.25167	0.068401
3.255	0.066766
3.25833	0.065245
3.26167	0.063826
3.265	0.062508
3.26833	0.061285
3.27167	0.060158
3.275	0.059135
3.27833	0.058208
3.28167	0.057374
3.285	0.05663
3.28833	0.055978
3.29167	0.055413
3.295	0.054932
3.29833	0.054549
3.30167	0.054273
3.305	0.054108
3.30833	0.054045
3.31167	0.05408
3.315	0.054221
3.31833	0.054483
3.32167	0.054864
3.325	0.055361
3.32833	0.055978
3.33167	0.056727
3.335	0.057614
3.33833	0.058627
3.34167	0.05976
3.345	0.061013
3.34833	0.062379
3.35167	0.06385
3.355	0.065418
3.35833	0.067078
3.36167	0.068827
3.365	0.070653
3.36833	0.072533
3.37167	0.074439
3.375	0.07636
3.37833	0.078288
3.38167	0.080204
3.385	0.082086
3.38833	0.083931
3.39167	0.085721
3.395	0.087441
3.39833	0.089074
3.40167	0.090609
3.405	0.09203
3.40833	0.093332
3.41167	0.09451
3.415	0.095555
3.41833	0.096448
3.42167	0.097185
3.425	0.097769
3.42833	0.09819
3.43167	0.09844
3.435	0.098511
3.43833	0.098417
3.44167	0.098159
3.445	0.097746
3.44833	0.097184
3.45167	0.096484
3.455	0.095658
3.45833	0.094704
3.46167	0.093638
3.465	0.092477
3.46833	0.091244
3.47167	0.089951
3.475	0.088606
3.47833	0.087224
3.48167	0.085819
3.485	0.084411
3.48833	0.083012
3.49167	0.081638
3.495	0.080306
3.49833	0.079029
3.50167	0.077807
3.505	0.076639
3.50833	0.075525
3.51167	0.074475
3.515	0.07348
3.51833	0.072533
3.52167	0.071637
3.525	0.07079
3.52833	0.06999
3.53167	0.069227
3.535	0.068498
3.53833	0.067796
3.54167	0.067123
3.545	0.066475
3.54833	0.065842
3.55167	0.065212
3.555	0.064585
3.55833	0.063969
3.56167	0.063367
3.565	0.062763
3.56833	0.06215
3.57167	0.061532
3.575	0.060914
3.57833	0.060286
3.58167	0.059628
3.585	0.058947
3.58833	0.058252
3.59167	0.057546
3.595	0.056822
3.59833	0.056076
3.60167	0.055311
3.605	0.054525
3.60833	0.053712
3.61167	0.052881
3.615	0.052036
3.61833	0.051183
3.62167	0.050321
3.625	0.049452
3.62833	0.048577
3.63167	0.047692
3.635	0.046785
3.63833	0.045868
3.64167	0.044946
3.645	0.044014
3.64833	0.043077
3.65167	0.042136
3.655	0.041207
3.65833	0.040291
3.66167	0.039388
3.665	0.038506
3.66833	0.037643
3.67167	0.036799
3.675	0.035969
3.67833	0.035159
3.68167	0.034376
3.685	0.033616
3.68833	0.03287
3.69167	0.032134
3.695	0.031428
3.69833	0.030747
3.70167	0.03009
3.705	0.029459
3.70833	0.028862
3.71167	0.02831
3.715	0.027789
3.71833	0.027298
3.72167	0.026831
3.725	0.026386
3.72833	0.025965
3.73167	0.025565
3.735	0.025189
3.73833	0.024841
3.74167	0.024529
3.745	0.024259
3.74833	0.024031
3.75167	0.023839
3.755	0.023681
3.75833	0.023549
3.76167	0.02344
3.765	0.023354
3.76833	0.023291
3.77167	0.023255
3.775	0.023244
3.77833	0.023259
3.78167	0.023301
3.785	0.023368
3.78833	0.023462
3.79167	0.023588
3.795	0.023745
3.79833	0.023918
3.80167	0.024104
3.805	0.024302
3.80833	0.024521
3.81167	0.024758
3.815	0.025022
3.81833	0.025319
3.82167	0.025655
3.825	0.02602
3.82833	0.026407
3.83167	0.026806
3.835	0.027211
3.83833	0.027623
3.84167	0.028038
3.845	0.028467
3.84833	0.028907
3.85167	0.029363
3.855	0.029832
3.85833	0.030311
3.86167	0.03079
3.865	0.031265
3.86833	0.031731
3.87167	0.032189
3.875	0.03263
3.87833	0.033058
3.88167	0.033474
3.885	0.033877
3.88833	0.034264
3.89167	0.034627
3.895	0.034982
3.89833	0.035325
3.90167	0.035656
3.905	0.035974
3.90833	0.036276
3.91167	0.036565
3.915	0.03684
3.91833	0.037115
3.92167	0.037389
3.925	0.037669
3.92833	0.037962
3.93167	0.038271
3.935	0.038595
3.93833	0.038928
3.94167	0.039262
3.945	0.039601
3.94833	0.039947
3.95167	0.040305
3.955	0.040664
3.95833	0.041022
3.96167	0.041396
3.965	0.041794
3.96833	0.042219
3.97167	0.042667
3.975	0.043143
3.97833	0.04365
3.98167	0.04418
3.985	0.044732
3.98833	0.045298
3.99167	0.045881
3.995	0.046486
3.99833	0.047122
4.00167	0.047788
4.005	0.048487
4.00833	0.049214
4.01167	0.049967
4.015	0.050735
4.01833	0.051511
4.02167	0.052298
4.025	0.053097
4.02833	0.05391
4.03167	0.054736
4.035	0.055571
4.03833	0.056411
4.04167	0.057256
4.045	0.058088
4.04833	0.058907
4.05167	0.059715
4.055	0.060533
4.05833	0.061359
4.06167	0.062191
4.065	0.063026
4.06833	0.063861
4.07167	0.064691
4.075	0.065503
4.07833	0.066296
4.08167	0.067073
4.085	0.067838
4.08833	0.068584
4.09167	0.069316
4.095	0.07004
4.09833	0.070767
4.10167	0.071498
4.105	0.072237
4.10833	0.072974
4.11167	0.073712
4.115	0.074449
4.11833	0.075182
4.12167	0.075925
4.125	0.076677
4.12833	0.07744
4.13167	0.078206
4.135	0.07897
4.13833	0.079737
4.14167	0.080507
4.145	0.081286
4.14833	0.082076
4.15167	0.082885
4.155	0.083723
4.15833	0.084591
4.16167	0.085471
4.165	0.086354
4.16833	0.087256
4.17167	0.08819
4.175	0.089146
4.17833	0.090117
4.18167	0.09111
4.185	0.092126
4.18833	0.093155
4.19167	0.09419
4.195	0.095237
4.19833	0.096301
4.20167	0.097373
4.205	0.09846
4.20833	0.099572
4.21167	0.100709
4.215	0.101864
4.21833	0.103029
4.22167	0.104206
4.225	0.105382
4.22833	0.106556
4.23167	0.107725
4.235	0.108886
4.23833	0.110036
4.24167	0.111169
4.245	0.112282
4.24833	0.113359
4.25167	0.114409
4.255	0.115441
4.25833	0.116457
4.26167	0.117453
4.265	0.118432
4.26833	0.119392
4.27167	0.12032
4.275	0.121207
4.27833	0.122055
4.28167	0.122868
4.285	0.123652
4.28833	0.124401
4.29167	0.12511
4.295	0.125766
4.29833	0.126372
4.30167	0.126927
4.305	0.127432
4.30833	0.12789
4.31167	0.128314
4.315	0.12871
4.31833	0.129064
4.32167	0.129377
4.325	0.129641
4.32833	0.129856
4.33167	0.130017
4.335	0.130136
4.33833	0.130218
4.34167	0.130257
4.345	0.130254
4.34833	0.130218
4.35167	0.130149
4.355	0.13003
4.35833	0.129863
4.36167	0.129662
4.365	0.129435
4.36833	0.129178
4.37167	0.128885
4.375	0.128558
4.37833	0.128206
4.38167	0.127828
4.385	0.127419
4.38833	0.126972
4.39167	0.12649
4.395	0.125984
4.39833	0.125459
4.40167	0.124911
4.405	0.124331
4.40833	0.12373
4.41167	0.123115
4.415	0.122483
4.41833	0.121818
4.42167	0.121123
4.425	0.120405
4.42833	0.119665
4.43167	0.118911
4.435	0.118145
4.43833	0.117369
4.44167	0.116573
4.445	0.115766
4.44833	0.114955
4.45167	0.114135
4.455	0.113299
4.45833	0.112445
4.46167	0.111586
4.465	0.110723
4.46833	0.109859
4.47167	0.109006
4.475	0.108168
4.47833	0.107349
4.48167	0.106544
4.485	0.105759
4.48833	0.104988
4.49167	0.104229
4.495	0.103492
4.49833	0.102793
4.50167	0.102148
4.505	0.101552
4.50833	0.101029
4.51167	0.100593
4.515	0.100262
4.51833	0.100054
4.52167	0.100008
4.525	0.100185
4.52833	0.100638
4.53167	0.101439
4.535	0.102678
4.53833	0.104461
4.54167	0.106902
4.545	0.110109
4.54833	0.1142
4.55167	0.119273
4.555	0.125402
4.55833	0.132643
4.56167	0.14103
4.565	0.150573
4.56833	0.161249
4.57167	0.173019
4.575	0.185843
4.57833	0.199653
4.58167	0.214354
4.585	0.229846
4.58833	0.246034
4.59167	0.262803
4.595	0.280016
4.59833	0.297536
4.60167	0.31524
4.605	0.332994
4.60833	0.350674
4.61167	0.368156
4.615	0.38536
4.61833	0.402204
4.62167	0.418624
4.625	0.434565
4.62833	0.449969
4.63167	0.464781
4.635	0.478956
4.63833	0.492464
4.64167	0.505273
4.645	0.517357
4.64833	0.528692
4.65167	0.539273
4.655	0.549085
4.65833	0.558123
4.66167	0.566384
4.665	0.573863
4.66833	0.58059
4.67167	0.586597
4.675	0.591911
4.67833	0.596533
4.68167	0.60047
4.685	0.603756
4.68833	0.606426
4.69167	0.608487
4.695	0.60995
4.69833	0.61084
4.70167	0.611204
4.705	0.611076
4.70833	0.610444
4.71167	0.609321
4.715	0.60774
4.71833	0.605757
4.72167	0.603391
4.725	0.600634
4.72833	0.597515
4.73167	0.59409
4.735	0.590383
4.73833	0.586376
4.74167	0.582083
4.745	0.577543
4.74833	0.572779
4.75167	0.56778
4.755	0.562548
4.75833	0.557129
4.76167	0.551535
4.765	0.545773
4.76833	0.539857
4.77167	0.533817
4.775	0.527664
4.77833	0.521393
4.78167	0.51502
4.785	0.508555
4.78833	0.502014
4.79167	0.495391
4.795	0.488704
4.79833	0.481976
4.80167	0.475221
4.805	0.468435
4.80833	0.461602
4.81167	0.454736
4.815	0.447852
4.81833	0.440963
4.82167	0.434075
4.825	0.427205
4.82833	0.420369
4.83167	0.413567
4.835	0.406793
4.83833	0.400028
4.84167	0.393265
4.845	0.386513
4.84833	0.379789
4.85167	0.373102
4.855	0.366454
4.85833	0.359858
4.86167	0.353323
4.865	0.346842
4.86833	0.340405
4.87167	0.334012
4.875	0.32767
4.87833	0.321386
4.88167	0.315154
4.885	0.308978
4.88833	0.302863
4.89167	0.296809
4.895	0.290806
4.89833	0.284849
4.90167	0.278941
4.905	0.27308
4.90833	0.267273
4.91167	0.261521
4.915	0.255823
4.91833	0.250169
4.92167	0.244567
4.925	0.239024
4.92833	0.233546
4.93167	0.228127
4.935	0.222771
4.93833	0.217487
4.94167	0.21228
4.945	0.207153
4.94833	0.202094
4.95167	0.197115
4.955	0.192218
4.95833	0.187395
4.96167	0.18263
4.965	0.177929
4.96833	0.173308
4.97167	0.168758
4.975	0.164288
4.97833	0.159912
4.98167	0.155646
4.985	0.151479
4.98833	0.147395
4.99167	0.14339
4.995	0.139473
4.99833	0.135642
5.00167	0.131895
5.005	0.128225
5.00833	0.124632
5.01167	0.12112
5.015	0.117689
5.01833	0.114342
5.02167	0.111081
5.025	0.107911
5.02833	0.104843
5.03167	0.101878
5.035	0.099002
5.03833	0.096202
5.04167	0.093487
5.045	0.090871
5.04833	0.088348
5.05167	0.085904
5.055	0.083527
5.05833	0.081228
5.06167	0.079002
5.065	0.076854
5.06833	0.07479
5.07167	0.072812
5.075	0.070929
5.07833	0.06913
5.08167	0.067403
5.085	0.065737
5.08833	0.064131
5.09167	0.062593
5.095	0.06112
5.09833	0.059718
5.10167	0.058389
5.105	0.05713
5.10833	0.055928
5.11167	0.054776
5.115	0.05368
5.11833	0.052621
5.12167	0.051594
5.125	0.050599
5.12833	0.049643
5.13167	0.048727
5.135	0.047843
5.13833	0.046999
5.14167	0.046194
5.145	0.045424
5.14833	0.044678
5.15167	0.043955
5.155	0.043262
5.15833	0.042603
5.16167	0.041973
5.165	0.041361
5.16833	0.040761
5.17167	0.040182
5.175	0.039623
5.17833	0.039077
5.18167	0.03855
5.185	0.038045
5.18833	0.037564
5.19167	0.037102
5.195	0.036651
5.19833	0.036207
5.20167	0.035762
5.205	0.03532
5.20833	0.034884
5.21167	0.034463
5.215	0.03406
5.21833	0.033672
5.22167	0.033301
5.225	0.032942
5.22833	0.03259
5.23167	0.032239
5.235	0.031891
5.23833	0.031552
5.24167	0.031225
5.245	0.030908
5.24833	0.030598
5.25167	0.0303
5.255	0.030021
5.25833	0.02976
5.26167	0.029495
5.265	0.029221
5.26833	0.02894
5.27167	0.028661
5.275	0.028382
5.27833	0.028105
5.28167	0.027848
5.285	0.027623
5.28833	0.027433
5.29167	0.02726
5.295	0.027101
5.29833	0.026956
5.30167	0.026822
5.305	0.026698
5.30833	0.026577
5.31167	0.026465
5.315	0.026359
5.31833	0.026274
5.32167	0.026214
5.325	0.02617
5.32833	0.026144
5.33167	0.026137
5.335	0.02616
5.33833	0.026199
5.34167	0.026255
5.345	0.02633
5.34833	0.026423
5.35167	0.026522
5.355	0.026622
5.35833	0.026728
5.36167	0.026846
5.365	0.026979
5.36833	0.027129
5.37167	0.027298
5.375	0.027476
5.37833	0.027648
5.38167	0.027814
5.385	0.027972
5.38833	0.028131
5.39167	0.028291
5.395	0.028458
5.39833	0.028634
5.40167	0.028813
5.405	0.028996
5.40833	0.029173
5.41167	0.029344
5.415	0.029507
5.41833	0.029664
5.42167	0.029815
5.425	0.029961
5.42833	0.030112
5.43167	0.03026
5.435	0.0304
5.43833	0.030528
5.44167	0.030646
5.445	0.030759
5.44833	0.030859
5.45167	0.030953
5.455	0.031052
5.45833	0.031166
5.46167	0.03129
5.465	0.031417
5.46833	0.031549
5.47167	0.031677
5.475	0.031799
5.47833	0.031913
5.48167	0.03202
5.485	0.032121
5.48833	0.032211
5.49167	0.032298
5.495	0.03239
5.49833	0.032488
5.50167	0.032589
5.505	0.032686
5.50833	0.032785
5.51167	0.032887
5.515	0.032987
5.51833	0.033084
5.52167	0.033176
5.525	0.033272
5.52833	0.033371
5.53167	0.033464
5.535	0.033543
5.53833	0.03361
5.54167	0.033669
5.545	0.03372
5.54833	0.033768
5.55167	0.033819
5.555	0.033873
5.55833	0.033924
5.56167	0.033968
5.565	0.034013
5.56833	0.034053
5.57167	0.03409
5.575	0.034134
5.57833	0.034187
5.58167	0.034243
5.585	0.034287
5.58833	0.034315
5.59167	0.034325
5.595	0.034327
5.59833	0.034325
5.60167	0.034321
5.605	0.034317
5.60833	0.034315
5.61167	0.034305
5.615	0.034285
5.61833	0.034253
5.62167	0.034211
5.625	0.034164
5.62833	0.034119
5.63167	0.03408
5.635	0.034038
5.63833	0.033986
5.64167	0.033936
5.645	0.033881
5.64833	0.033812
5.65167	0.033726
5.655	0.033628
5.65833	0.033518
5.66167	0.033385
5.665	0.033241
5.66833	0.033097
5.67167	0.032951
5.675	0.032796
5.67833	0.032627
5.68167	0.032454
5.685	0.032276
5.68833	0.032092
5.69167	0.03189
5.695	0.031677
5.69833	0.031457
5.70167	0.031229
5.705	0.030982
5.70833	0.03072
5.71167	0.030454
5.715	0.03019
5.71833	0.029927
5.72167	0.029668
5.725	0.029412
5.72833	0.02916
5.73167	0.028912
5.735	0.028677
5.73833	0.028448
5.74167	0.028212
5.745	0.027973
5.74833	0.027737
5.75167	0.027515
5.755	0.027301
5.75833	0.02709
5.76167	0.026889
5.765	0.026699
5.76833	0.026522
5.77167	0.026349
5.775	0.026177
5.77833	0.026018
5.78167	0.025874
5.785	0.02574
5.78833	0.025606
5.79167	0.025476
5.795	0.025366
5.79833	0.02528
5.80167	0.02521
5.805	0.025147
5.80833	0.025099
5.81167	0.025066
5.815	0.025047
5.81833	0.025031
5.82167	0.025024
5.825	0.025039
5.82833	0.025074
5.83167	0.025121
5.835	0.02518
5.83833	0.025254
5.84167	0.025342
5.845	0.025443
5.84833	0.025564
5.85167	0.025703
5.855	0.025859
5.85833	0.026036
5.86167	0.026231
5.865	0.026441
5.86833	0.026668
5.87167	0.026924
5.875	0.027191
5.87833	0.027458
5.88167	0.027733
5.885	0.02803
5.88833	0.028348
5.89167	0.028675
5.895	0.029012
5.89833	0.029368
5.90167	0.029741
5.905	0.030124
5.90833	0.030519
5.91167	0.030926
5.915	0.031349
5.91833	0.031777
5.92167	0.032212
5.925	0.032651
5.92833	0.033093
5.93167	0.03354
5.935	0.034008
5.93833	0.034496
5.94167	0.035
5.945	0.035515
5.94833	0.036031
5.95167	0.036547
5.955	0.03705
5.95833	0.037545
5.96167	0.038045
5.965	0.038562
5.96833	0.039107
5.97167	0.039674
5.975	0.04025
5.97833	0.04084
5.98167	0.041439
5.985	0.042037
5.98833	0.042626
5.99167	0.043216
5.995	0.043813
5.99833	0.044415
6.00167	0.045024
6.005	0.045641
6.00833	0.046265
6.01167	0.046894
6.015	0.04753
6.01833	0.048185
6.02167	0.048851
6.025	0.049516
6.02833	0.050164
6.03167	0.050796
6.035	0.051428
6.03833	0.052053
6.04167	0.05267
6.045	0.05328
6.04833	0.053891
6.05167	0.054505
6.055	0.055099
6.05833	0.055676
6.06167	0.056233
6.065	0.05677
6.06833	0.057292
6.07167	0.057792
6.075	0.058271
6.07833	0.058721
6.08167	0.059155
6.085	0.059581
6.08833	0.059996
6.09167	0.060388
6.095	0.060747
6.09833	0.061077
6.10167	0.061366
6.105	0.061609
6.10833	0.061808
6.11167	0.061979
6.115	0.062131
6.11833	0.062262
6.12167	0.062374
6.125	0.062474
6.12833	0.06256
6.13167	0.062619
6.135	0.062638
6.13833	0.062615
6.14167	0.062556
6.145	0.062453
6.14833	0.062298
6.15167	0.062096
6.155	0.06187
6.15833	0.061634
6.16167	0.06139
6.165	0.061127
6.16833	0.06085
6.17167	0.060563
6.175	0.060258
6.17833	0.059924
6.18167	0.059557
6.185	0.059172
6.18833	0.058786
6.19167	0.058397
6.195	0.057996
6.19833	0.057578
6.20167	0.057149
6.205	0.056717
6.20833	0.056282
6.21167	0.055855
6.215	0.055448
6.21833	0.055071
6.22167	0.054721
6.225	0.054399
6.22833	0.054104
6.23167	0.053837
6.235	0.053596
6.23833	0.05339
6.24167	0.053235
6.245	0.053131
6.24833	0.053077
6.25167	0.053072
6.255	0.053129
6.25833	0.053254
6.26167	0.053449
6.265	0.05372
6.26833	0.054076
6.27167	0.05453
6.275	0.055089
6.27833	0.05577
6.28167	0.05658
6.285	0.057521
6.28833	0.058596
6.29167	0.059813
6.295	0.061181
6.29833	0.06271
6.30167	0.064404
6.305	0.066271
6.30833	0.06832
6.31167	0.070561
6.315	0.072993
6.31833	0.075616
6.32167	0.07844
6.325	0.081472
6.32833	0.084716
6.33167	0.088179
6.335	0.091874
6.33833	0.095802
6.34167	0.099944
6.345	0.104296
6.34833	0.108875
6.35167	0.113681
6.355	0.118693
6.35833	0.123908
6.36167	0.129332
6.365	0.134961
6.36833	0.140778
6.37167	0.146761
6.375	0.152896
6.37833	0.159176
6.38167	0.165605
6.385	0.172181
6.38833	0.17887
6.39167	0.18565
6.395	0.192528
6.39833	0.199504
6.40167	0.206539
6.405	0.21359
6.40833	0.220652
6.41167	0.227742
6.415	0.234836
6.41833	0.241882
6.42167	0.248853
6.425	0.255758
6.42833	0.262594
6.43167	0.269322
6.435	0.275908
6.43833	0.282357
6.44167	0.288679
6.445	0.294851
6.44833	0.300832
6.45167	0.306605
6.455	0.312167
6.45833	0.317504
6.46167	0.322593
6.465	0.327427
6.46833	0.332004
6.47167	0.336322
6.475	0.340364
6.47833	0.344117
6.48167	0.347568
6.485	0.350705
6.48833	0.353531
6.49167	0.356053
6.495	0.358282
6.49833	0.360204
6.50167	0.361806
6.505	0.363088
6.50833	0.364053
6.51167	0.364705
6.515	0.365029
6.51833	0.365029
6.52167	0.364713
6.525	0.364093
6.52833	0.363164
6.53167	0.361927
6.535	0.360397
6.53833	0.358599
6.54167	0.356556
6.545	0.354271
6.54833	0.351742
6.55167	0.348961
6.555	0.345937
6.55833	0.342679
6.56167	0.339185
6.565	0.335472
6.56833	0.331559
6.57167	0.327477
6.575	0.323231
6.57833	0.318821
6.58167	0.314265
6.585	0.309571
6.58833	0.30475
6.59167	0.299793
6.595	0.294718
6.59833	0.289551
6.60167	0.284309
6.605	0.278997
6.60833	0.273629
6.61167	0.268227
6.615	0.262794
6.61833	0.257316
6.62167	0.251786
6.625	0.246218
6.62833	0.240635
6.63167	0.235049
6.635	0.22948
6.63833	0.223938
6.64167	0.218434
6.645	0.212966
6.64833	0.207535
6.65167	0.20214
6.655	0.196782
6.65833	0.191466
6.66167	0.186197
6.665	0.180994
6.66833	0.175856
6.67167	0.170789
6.675	0.165787
6.67833	0.160854
6.68167	0.155989
6.685	0.151193
6.68833	0.146472
6.69167	0.141828
6.695	0.137279
6.69833	0.132838
6.70167	0.128503
6.705	0.124263
6.70833	0.120113
6.71167	0.116051
6.715	0.112072
6.71833	0.108178
6.72167	0.104382
6.725	0.100698
6.72833	0.097123
6.73167	0.093653
6.735	0.09029
6.73833	0.087032
6.74167	0.083869
6.745	0.080795
6.74833	0.077814
6.75167	0.074926
6.755	0.072133
6.75833	0.069438
6.76167	0.066843
6.765	0.064346
6.76833	0.061938
6.77167	0.059613
6.775	0.057372
6.77833	0.055218
6.78167	0.053149
6.785	0.051157
6.78833	0.04925
6.79167	0.047441
6.795	0.045722
6.79833	0.044081
6.80167	0.042506
6.805	0.041007
6.80833	0.039583
6.81167	0.038222
6.815	0.036922
6.81833	0.035684
6.82167	0.034514
6.825	0.033411
6.82833	0.032372
6.83167	0.031388
6.835	0.030445
6.83833	0.029544
6.84167	0.028689
6.845	0.02788
6.84833	0.027105
6.85167	0.026371
6.855	0.025692
6.85833	0.025059
6.86167	0.024468
6.865	0.023907
6.86833	0.023384
6.87167	0.022898
6.875	0.022446
6.87833	0.022023
6.88167	0.021624
6.885	0.021251
6.88833	0.020901
6.89167	0.020572
6.895	0.020268
6.89833	0.019987
6.90167	0.019728
6.905	0.019478
6.90833	0.019245
6.91167	0.019032
6.915	0.018833
6.91833	0.018646
6.92167	0.018483
6.925	0.018343
6.92833	0.018225
6.93167	0.018121
6.935	0.018039
6.93833	0.017976
6.94167	0.017921
6.945	0.017879
6.94833	0.017847
6.95167	0.017829
6.955	0.017818
6.95833	0.017813
6.96167	0.017821
6.965	0.017836
6.96833	0.017863
6.97167	0.017899
6.975	0.017942
6.97833	0.017996
6.98167	0.018061
6.985	0.018159
6.98833	0.01828
6.99167	0.018409
6.995	0.01854
6.99833	0.018672
7.00167	0.018802
7.005	0.018912
7.00833	0.019006
7.01167	0.019094
7.015	0.019185
7.01833	0.019288
7.02167	0.01939
7.025	0.019498
7.02833	0.019609
7.03167	0.01972
7.035	0.019831
7.03833	0.019932
7.04167	0.020036
7.045	0.020133
7.04833	0.020223
7.05167	0.020311
7.055	0.020401
7.05833	0.020486
7.06167	0.02056
7.065	0.020626
7.06833	0.02069
7.07167	0.020735
7.075	0.020761
7.07833	0.020784
7.08167	0.020806
7.085	0.020825
7.08833	0.020834
7.09167	0.020851
7.095	0.020869
7.09833	0.020878
7.10167	0.020875
7.105	0.020866
7.10833	0.020856
7.11167	0.020836
7.115	0.020818
7.11833	0.020806
7.12167	0.020797
7.125	0.020786
7.12833	0.020776
7.13167	0.020773
7.135	0.020771
7.13833	0.020761
7.14167	0.020742
7.145	0.02072
7.14833	0.020693
7.15167	0.020655
7.155	0.020612
7.15833	0.02058
7.16167	0.020571
7.165	0.020588
7.16833	0.020624
7.17167	0.02067
7.175	0.020719
7.17833	0.02077
7.18167	0.020816
7.185	0.020861
7.18833	0.020907
7.19167	0.020956
7.195	0.021011
7.19833	0.021068
7.20167	0.021126
7.205	0.021189
7.20833	0.021258
7.21167	0.021341
7.215	0.021437
7.21833	0.021556
7.22167	0.021694
7.225	0.021844
7.22833	0.022003
7.23167	0.022163
7.235	0.022329
7.23833	0.022495
7.24167	0.022661
7.245	0.022827
7.24833	0.022994
7.25167	0.023172
7.255	0.02335
7.25833	0.023531
7.26167	0.02372
7.265	0.023929
7.26833	0.024153
7.27167	0.024386
7.275	0.024619
7.27833	0.024854
7.28167	0.025084
7.285	0.025305
7.28833	0.025521
7.29167	0.025745
7.295	0.025985
7.29833	0.026234
7.30167	0.026487
7.305	0.026746
7.30833	0.027008
7.31167	0.027266
7.315	0.027518
7.31833	0.027779
7.32167	0.028051
7.325	0.028328
7.32833	0.028609
7.33167	0.028899
7.335	0.0292
7.33833	0.029506
7.34167	0.029815
7.345	0.030132
7.34833	0.030462
7.35167	0.030801
7.355	0.031149
7.35833	0.031498
7.36167	0.031841
7.365	0.032174
7.36833	0.032498
7.37167	0.032819
7.375	0.033143
7.37833	0.03347
7.38167	0.0338
7.385	0.034134
7.38833	0.034469
7.39167	0.034802
7.395	0.035129
7.39833	0.035442
7.40167	0.035746
7.405	0.036051
7.40833	0.036359
7.41167	0.036654
7.415	0.036926
7.41833	0.037185
7.42167	0.037437
7.425	0.037679
7.42833	0.037904
7.43167	0.038115
7.435	0.038314
7.43833	0.038503
7.44167	0.038671
7.445	0.038806
7.44833	0.038905
7.45167	0.038977
7.455	0.039034
7.45833	0.039077
7.46167	0.039114
7.465	0.039148
7.46833	0.03918
7.47167	0.039189
7.475	0.039166
7.47833	0.03911
7.48167	0.039024
7.485	0.03892
7.48833	0.038796
7.49167	0.038664
7.495	0.038517
7.49833	0.038352
7.50167	0.038166
7.505	0.037958
7.50833	0.037735
7.51167	0.037494
7.515	0.037237
7.51833	0.036966
7.52167	0.036681
7.525	0.036381
7.52833	0.036055
7.53167	0.035705
7.535	0.035346
7.53833	0.034986
7.54167	0.034615
7.545	0.034225
7.54833	0.033824
7.55167	0.03342
7.555	0.033022
7.55833	0.032628
7.56167	0.03224
7.565	0.031851
7.56833	0.031458
7.57167	0.031056
7.575	0.030635
7.57833	0.030196
7.58167	0.029735
7.585	0.029268
7.58833	0.028805
7.59167	0.028355
7.595	0.027916
7.59833	0.027487
7.60167	0.027067
7.605	0.026655
7.60833	0.026259
7.61167	0.025874
7.615	0.025497
7.61833	0.02512
7.62167	0.024754
7.625	0.024403
7.62833	0.024059
7.63167	0.023721
7.635	0.023395
7.63833	0.023097
7.64167	0.022825
7.645	0.022576
7.64833	0.022349
7.65167	0.022148
7.655	0.021973
7.65833	0.021817
7.66167	0.021682
7.665	0.02157
7.66833	0.021479
7.67167	0.021406
7.675	0.021355
7.67833	0.021324
7.68167	0.021324
7.685	0.02135
7.68833	0.021409
7.69167	0.021501
7.695	0.021621
7.69833	0.021778
7.70167	0.021965
7.705	0.022189
7.70833	0.022445
7.71167	0.022724
7.715	0.02303
7.71833	0.023366
7.72167	0.023731
7.725	0.024116
7.72833	0.024529
7.73167	0.024983
7.735	0.025476
7.73833	0.025996
7.74167	0.026536
7.745	0.027094
7.74833	0.027673
7.75167	0.028266
7.755	0.028872
7.75833	0.029492
7.76167	0.030132
7.765	0.030792
7.76833	0.031468
7.77167	0.032151
7.775	0.032844
7.77833	0.033556
7.78167	0.03429
7.785	0.035035
7.78833	0.03579
7.79167	0.036558
7.795	0.037331
7.79833	0.038095
7.80167	0.038835
7.805	0.039561
7.80833	0.040276
7.81167	0.040983
7.815	0.04168
7.81833	0.042365
7.82167	0.043033
7.825	0.043677
7.82833	0.044289
7.83167	0.04486
7.835	0.045394
7.83833	0.045895
7.84167	0.046371
7.845	0.04682
7.84833	0.047248
7.85167	0.047657
7.855	0.04804
7.85833	0.048387
7.86167	0.04869
7.865	0.048953
7.86833	0.049169
7.87167	0.049329
7.875	0.049442
7.87833	0.049524
7.88167	0.049591
7.885	0.049626
7.88833	0.049619
7.89167	0.049572
7.895	0.049482
7.89833	0.049352
7.90167	0.049169
7.905	0.048941
7.90833	0.048683
7.91167	0.048407
7.915	0.048114
7.91833	0.047788
7.92167	0.047432
7.925	0.047052
7.92833	0.046641
7.93167	0.046194
7.935	0.045717
7.93833	0.045225
7.94167	0.044722
7.945	0.044206
7.94833	0.043677
7.95167	0.043137
7.955	0.042583
7.95833	0.042013
7.96167	0.041431
7.965	0.04084
7.96833	0.040243
7.97167	0.03964
7.975	0.039034
7.97833	0.038429
7.98167	0.037824
7.985	0.037211
7.98833	0.036601
7.99167	0.036001
7.995	0.035409
7.99833	0.03482
8.00167	0.034235
8.005	0.033669
8.00833	0.033117
8.01167	0.032575
8.015	0.032037
8.01833	0.031504
8.02167	0.030988
8.025	0.030491
8.02833	0.030011
8.03167	0.02953
8.035	0.029052
8.03833	0.028583
8.04167	0.028128
8.045	0.027678
8.04833	0.027231
8.05167	0.026802
8.055	0.026391
8.05833	0.025994
8.06167	0.025606
8.065	0.025228
8.06833	0.024869
8.07167	0.024536
8.075	0.024231
8.07833	0.023943
8.08167	0.023659
8.085	0.023373
8.08833	0.023088
8.09167	0.022809
8.095	0.022525
8.09833	0.022238
8.10167	0.021968
8.105	0.02173
8.10833	0.021516
8.11167	0.021311
8.115	0.021114
8.11833	0.020929
8.12167	0.020755
8.125	0.020579
8.12833	0.020398
8.13167	0.020224
8.135	0.020074
8.13833	0.01994
8.14167	0.019808
8.145	0.019674
8.14833	0.019541
8.15167	0.019406
8.155	0.019265
8.15833	0.019129
8.16167	0.019006
8.165	0.018902
8.16833	0.018814
8.17167	0.018744
8.175	0.018689
8.17833	0.018643
8.18167	0.018599
8.185	0.018552
8.18833	0.018495
8.19167	0.018437
8.195	0.018388
8.19833	0.018353
8.20167	0.018327
8.205	0.018312
8.20833	0.018304
8.21167	0.018304
8.215	0.018305
8.21833	0.0183
8.22167	0.018282
8.225	0.018257
8.22833	0.018247
8.23167	0.018241
8.235	0.018235
8.23833	0.018228
8.24167	0.018241
8.245	0.018267
8.24833	0.018289
8.25167	0.018306
8.255	0.018319
8.25833	0.018333
8.26167	0.01834
8.265	0.018347
8.26833	0.01836
8.27167	0.018376
8.275	0.0184
8.27833	0.018436
8.28167	0.018481
8.285	0.018523
8.28833	0.018557
8.29167	0.018596
8.295	0.018643
8.29833	0.018689
8.30167	0.018738
8.305	0.018797
8.30833	0.018875
8.31167	0.018966
8.315	0.019062
8.31833	0.019164
8.32167	0.019264
8.325	0.019371
8.32833	0.019487
8.33167	0.019612
8.335	0.019737
8.33833	0.019861
8.34167	0.019994
8.345	0.02014
8.34833	0.02029
8.35167	0.020448
8.355	0.020622
8.35833	0.020826
8.36167	0.021048
8.365	0.021287
8.36833	0.021535
8.37167	0.021793
8.375	0.022057
8.37833	0.022333
8.38167	0.022639
8.385	0.022973
8.38833	0.023328
8.39167	0.023687
8.395	0.02406
8.39833	0.024446
8.40167	0.024833
8.405	0.025226
8.40833	0.025643
8.41167	0.026098
8.415	0.026579
8.41833	0.027067
8.42167	0.027558
8.425	0.028052
8.42833	0.028544
8.43167	0.029034
8.435	0.029525
8.43833	0.030023
8.44167	0.03053
8.445	0.031044
8.44833	0.031563
8.45167	0.032077
8.455	0.032579
8.45833	0.033076
8.46167	0.033579
8.465	0.034096
8.46833	0.034613
8.47167	0.035119
8.475	0.035602
8.47833	0.036064
8.48167	0.036502
8.485	0.036901
8.48833	0.037266
8.49167	0.037613
8.495	0.037962
8.49833	0.038308
8.50167	0.038638
8.505	0.038953
8.50833	0.03926
8.51167	0.039552
8.515	0.039815
8.51833	0.040046
8.52167	0.040258
8.525	0.040449
8.52833	0.040614
8.53167	0.040753
8.535	0.040872
8.53833	0.040979
8.54167	0.041058
8.545	0.041112
8.54833	0.041151
8.55167	0.041168
8.555	0.041163
8.55833	0.041136
8.56167	0.041092
8.565	0.041021
8.56833	0.040916
8.57167	0.040785
8.575	0.040634
8.57833	0.040461
8.58167	0.040262
8.585	0.040039
8.58833	0.039793
8.59167	0.039521
8.595	0.039224
8.59833	0.03891
8.60167	0.038591
8.605	0.038267
8.60833	0.037934
8.61167	0.037596
8.615	0.037248
8.61833	0.03689
8.62167	0.036507
8.625	0.036104
8.62833	0.035687
8.63167	0.035269
8.635	0.034843
8.63833	0.034414
8.64167	0.033981
8.645	0.03354
8.64833	0.033096
8.65167	0.032656
8.655	0.032228
8.65833	0.03181
8.66167	0.031391
8.665	0.030976
8.66833	0.030557
8.67167	0.030128
8.675	0.029689
8.67833	0.029251
8.68167	0.028824
8.685	0.028413
8.68833	0.028035
8.69167	0.02768
8.695	0.027337
8.69833	0.026995
8.70167	0.026653
8.705	0.026323
8.70833	0.026003
8.71167	0.025695
8.715	0.025411
8.71833	0.025159
8.72167	0.024947
8.725	0.024764
8.72833	0.024606
8.73167	0.024474
8.735	0.024375
8.73833	0.024317
8.74167	0.0243
8.745	0.024331
8.74833	0.024433
8.75167	0.024617
8.755	0.024891
8.75833	0.025252
8.76167	0.025712
8.765	0.026286
8.76833	0.026994
8.77167	0.027845
8.775	0.028853
8.77833	0.030026
8.78167	0.031384
8.785	0.032936
8.78833	0.034683
8.79167	0.036634
8.795	0.0388
8.79833	0.041202
8.80167	0.043846
8.805	0.046731
8.80833	0.049854
8.81167	0.053198
8.815	0.056751
8.81833	0.060499
8.82167	0.064426
8.825	0.068518
8.82833	0.072756
8.83167	0.07713
8.835	0.081629
8.83833	0.086237
8.84167	0.09092
8.845	0.095652
8.84833	0.1004
8.85167	0.105139
8.855	0.109846
8.85833	0.114502
8.86167	0.119097
8.865	0.123612
8.86833	0.128044
8.87167	0.132386
8.875	0.136617
8.87833	0.140712
8.88167	0.144653
8.885	0.148446
8.88833	0.152092
8.89167	0.155591
8.895	0.158932
8.89833	0.162118
8.90167	0.165151
8.905	0.168024
8.90833	0.170725
8.91167	0.173248
8.915	0.175599
8.91833	0.177792
8.92167	0.179831
8.925	0.181704
8.92833	0.183414
8.93167	0.18497
8.935	0.186376
8.93833	0.18763
8.94167	0.18874
8.945	0.189725
8.94833	0.190594
8.95167	0.191344
8.955	0.191984
8.95833	0.192514
8.96167	0.19293
8.965	0.193227
8.96833	0.193406
8.97167	0.193468
8.975	0.193419
8.97833	0.19328
8.98167	0.193073
8.985	0.192814
8.98833	0.192482
8.99167	0.192072
8.995	0.191581
8.99833	0.191018
9.00167	0.190381
9.005	0.189667
9.00833	0.188898
9.01167	0.188092
9.015	0.187241
9.01833	0.186331
9.02167	0.185361
9.025	0.184352
9.02833	0.183323
9.03167	0.182271
9.035	0.181191
9.03833	0.180078
9.04167	0.178932
9.045	0.177747
9.04833	0.17652
9.05167	0.175254
9.055	0.173966
9.05833	0.172664
9.06167	0.171341
9.065	0.169994
9.06833	0.168622
9.07167	0.167235
9.075	0.165841
9.07833	0.164439
9.08167	0.163026
9.085	0.161589
9.08833	0.16014
9.09167	0.158689
9.095	0.157241
9.09833	0.155784
9.10167	0.154319
9.105	0.15286
9.10833	0.151403
9.11167	0.149936
9.115	0.148456
9.11833	0.146974
9.12167	0.145496
9.125	0.144012
9.12833	0.14252
9.13167	0.141019
9.135	0.139518
9.13833	0.138011
9.14167	0.136505
9.145	0.135014
9.14833	0.133536
9.15167	0.132073
9.155	0.130612
9.15833	0.129159
9.16167	0.127722
9.165	0.126296
9.16833	0.124876
9.17167	0.123455
9.175	0.122037
9.17833	0.120629
9.18167	0.119232
9.185	0.11784
9.18833	0.116449
9.19167	0.115072
9.195	0.113711
9.19833	0.112362
9.20167	0.111018
9.205	0.109683
9.20833	0.108359
9.21167	0.107041
9.215	0.105731
9.21833	0.10442
9.22167	0.103106
9.225	0.101803
9.22833	0.100509
9.23167	0.099233
9.235	0.097968
9.23833	0.096725
9.24167	0.095501
9.245	0.094279
9.24833	0.09306
9.25167	0.091842
9.255	0.090634
9.25833	0.089436
9.26167	0.08825
9.265	0.087084
9.26833	0.085936
9.27167	0.084803
9.275	0.08367
9.27833	0.082535
9.28167	0.081408
9.285	0.080292
9.28833	0.079182
9.29167	0.078077
9.295	0.076996
9.29833	0.075948
9.30167	0.074916
9.305	0.073886
9.30833	0.072862
9.31167	0.071854
9.315	0.070852
9.31833	0.06985
9.32167	0.068858
9.325	0.06789
9.32833	0.066948
9.33167	0.066023
9.335	0.065106
9.33833	0.064192
9.34167	0.063283
9.345	0.062386
9.34833	0.061504
9.35167	0.060641
9.355	0.059801
9.35833	0.058993
9.36167	0.058212
9.365	0.057446
9.36833	0.056695
9.37167	0.055963
9.375	0.055257
9.37833	0.054563
9.38167	0.053881
9.385	0.053223
9.38833	0.052594
9.39167	0.051989
9.395	0.051403
9.39833	0.05084
9.40167	0.050307
9.405	0.049802
9.40833	0.049319
9.41167	0.04886
9.415	0.048429
9.41833	0.048033
9.42167	0.047668
9.425	0.047326
9.42833	0.047009
9.43167	0.046722
9.435	0.046465
9.43833	0.04624
9.44167	0.046049
9.445	0.045898
9.44833	0.045777
9.45167	0.045673
9.455	0.045581
9.45833	0.045515
9.46167	0.045493
9.465	0.045506
9.46833	0.045552
9.47167	0.04563
9.475	0.045738
9.47833	0.045868
9.48167	0.045999
9.485	0.046139
9.48833	0.046296
9.49167	0.04649
9.495	0.046724
9.49833	0.046988
9.50167	0.047267
9.505	0.047559
9.50833	0.047868
9.51167	0.048197
9.515	0.048547
9.51833	0.048914
9.52167	0.049293
9.525	0.049689
9.52833	0.050101
9.53167	0.050517
9.535	0.050918
9.53833	0.05131
9.54167	0.051709
9.545	0.052117
9.54833	0.05252
9.55167	0.05292
9.555	0.05332
9.55833	0.053721
9.56167	0.054113
9.565	0.054496
9.56833	0.054875
9.57167	0.055249
9.575	0.055622
9.57833	0.055998
9.58167	0.056375
9.585	0.056739
9.58833	0.057093
9.59167	0.057433
9.595	0.05776
9.59833	0.058064
9.60167	0.058348
9.605	0.058612
9.60833	0.058866
9.61167	0.05911
9.615	0.059342
9.61833	0.059558
9.62167	0.059755
9.625	0.059944
9.62833	0.060111
9.63167	0.060254
9.635	0.060376
9.63833	0.060488
9.64167	0.060597
9.645	0.060694
9.64833	0.060778
9.65167	0.060847
9.655	0.060902
9.65833	0.06094
9.66167	0.060962
9.665	0.060965
9.66833	0.060965
9.67167	0.060961
9.675	0.060955
9.67833	0.060925
9.68167	0.060872
9.685	0.060808
9.68833	0.060734
9.69167	0.060643
9.695	0.060536
9.69833	0.060435
9.70167	0.060337
9.705	0.06023
9.70833	0.060106
9.71167	0.059976
9.715	0.059842
9.71833	0.059697
9.72167	0.059544
9.725	0.05939
9.72833	0.059236
9.73167	0.059078
9.735	0.058918
9.73833	0.058763
9.74167	0.058612
9.745	0.058455
9.74833	0.05828
9.75167	0.058083
9.755	0.057873
9.75833	0.057662
9.76167	0.057458
9.765	0.057266
9.76833	0.057096
9.77167	0.056952
9.775	0.056815
9.77833	0.056669
9.78167	0.056506
9.785	0.05633
9.78833	0.056142
9.79167	0.05595
9.795	0.05576
9.79833	0.055571
9.80167	0.055395
9.805	0.05523
9.80833	0.05508
9.81167	0.054933
9.815	0.054796
9.81833	0.054657
9.82167	0.054508
9.825	0.054354
9.82833	0.054207
9.83167	0.054065
9.835	0.053923
9.83833	0.053792
9.84167	0.053677
9.845	0.053565
9.84833	0.053444
9.85167	0.053323
9.855	0.053206
9.85833	0.05309
[truncated: 17,443 more rows]
