# Supplementary material for: Secreted antigen A peptidoglycan hydrolase is essential for Enterococcus faecium cell separation and priming of immune checkpoint inhibitor therapy
Source: eLife. 2024 Jun 10;13:RP95297. doi: 10.7554/eLife.95297 (PMC11164530; doi:10.7554/eLife.95297)
Supplement: Figure 3—source data 1. [file elife-95297-fig3-data1.xlsx]

## Sheet: Figure 3a
Peak #	WT						ΔsagA						ΔsagA/ psagA
1	4.54917	4.65288	4.6657	4.55922	4.67518	3.68213	4.60674	4.56732	4.59196	4.50068	4.50921	4.6529	5.88264	5.80488	5.8404	5.84741	5.57885	5.6034
2	3.86935	3.76838	3.77566	3.77938	3.63944	4.27637	0.382323	0.391837	0.37833	0.320772	0.31914	0.311895	3.43023	3.33862	3.27574	3.4126	3.31157	3.23274
3	2.09566	1.98943	2.05239	2.02809	2.01617	2.97405	1.10474	1.06624	1.06406	1.14489	1.10528	1.13576	2.1982	2.17736	2.17897	2.10234	2.09836	2.03593
4	16.6971	16.044	16.3508	16.139	17.5237	14.0016	18.4398	19.0015	19.3148	19.4598	19.5152	19.5052	18.9297	18.6179	18.3413	18.7301	18.3891	18.1681
5	2.63618	2.43385	2.62024	2.55927	2.201	3.62136	3.11333	3.19461	2.72597	2.45452	3.16836	2.50063	2.4817	2.60157	2.50742	2.46749	2.43337	2.31237
6	4.92445	6.38984	4.85042	4.73942	6.32531	5.38032	4.51543	4.86134	4.85857	4.77405	4.84199	4.85468	5.92373	6.03576	5.89534	6.02778	6.03885	5.931
7	6.26412	5.74109	5.86045	5.9312	5.70452	6.13579	4.34939	4.54502	4.49919	4.45106	4.37154	4.10149	5.5687	5.8348	5.6601	5.14288	5.64422	4.97495
8	1.17498	1.1075	1.15199	1.133	1.19178	0.783564	0.999679	0.802194	1.2577	1.24091	0.498039	1.26436	1.07738	0.458812	1.10624	0.370838	1.12651	1.20393
9	21.6931	21.1189	21.4335	21.3454	20.1458	25.0373	23.2416	22.9852	22.9582	22.7343	23.6929	22.8347	18.7554	19.2722	18.9897	19.1817	19.2109	18.5299
10	12.3942	11.7763	12.3357	11.8077	11.6664	10.3563	11.3488	11.7894	12.1887	12.2582	12.4048	12.4306	11.8121	11.8201	11.8973	12.0351	11.6874	11.7715
11	12.3942	8.82821	8.69431	10.0755	9.32717	8.40765	7.47227	6.61063	7.98166	12.2582	6.64921	7.43236	8.38953	8.44804	8.8277	8.68404	8.91175	8.85641
12	2.13582	2.1318	2.17001	1.95185	2.20193	2.30209	3.80479	4.21015	1.2481	1.34883	1.573	1.41915	1.83343	1.68363	1.69202	1.91834	1.7972	1.91905
13	5.35824	5.31205	5.18238	5.21557	5.10808	6.30268	6.8957	6.44768	6.47168	6.62458	6.54284	6.72144	5.10565	5.2961	5.09929	5.22674	5.17474	4.95994
14	5.89048	5.63058	5.815	5.62011	5.36329	3.10219	6.73035	6.61785	7.43512	7.71307	7.70414	7.74213	5.60965	5.65799	5.70485	5.82139	5.6269	5.54086
15	0.940794	3.07529	3.04143	3.11523	2.91023	3.63657	2.99499	2.909	3.02594	3.20199	3.10432	3.09265	3.00193	2.95219	2.98362	3.03129	2.97025	4.95994

## Sheet: Figure 3c
WT						ΔsagA						ΔsagA/psagA
100.465	97.8437	98.0326	98.1294	94.4958	111.033	29.7531	26.3377	27.0205	25.6163	26.1758	25.3817	89.0637	86.6851	85.0525	88.6061	85.9828	83.9361

## Sheet: Figure 3d
Untreated						WT						ΔsagA						ΔsagA/ psagA
0.99505	1.0099	0.99505	0.990148	0.990148	1.0197	7.06931	6.80198	6.90594	7.65517	8.12808	8.61576	1.90099	1.9604	2.27228	3.29557	2.57143	3.29557	9.07426	8.22772	9.08911	9.10345	8.57143	8.71921

## Sheet: Figure 3e
Untreated						WT						ΔsagA						ΔsagA/ psagA
1	1	1	1	1	1	7600	7800	9800	7000	9200	7800	5400	8200	7200	5600	4600	6000	17000	11000	12800	18400	16400	14200
