# Supplementary material for: Secreted antigen A peptidoglycan hydrolase is essential for Enterococcus faecium cell separation and priming of immune checkpoint inhibitor therapy
Source: eLife. 2024 Jun 10;13:RP95297. doi: 10.7554/eLife.95297 (PMC11164530; doi:10.7554/eLife.95297)
Supplement: Figure 4—figure supplement 1—source data 1. [file elife-95297-fig4-figsupp1-data1.xlsx]

## Sheet: Sheet1
			CD45+ %		NKT %	CD3+ (% of CD45 cells)	CD4	FoxP3	CD8	GranzB	Ki67	CD3-, NK1.1+	PD-1	OVA+, PD-1+
	Sample:	Count	Lymphocytes-2/Single Cells/Single Cells/Live cells/CD45+ | Freq. of Parent		Lymphocytes-2/Single Cells/Single Cells/Live cells/CD45+/CD3+, NK1.1+ | Freq. of Parent	Lymphocytes-2/Single Cells/Single Cells/Live cells/CD45+/CD3+,NK1.1- | Freq. of Parent	Lymphocytes-2/Single Cells/Single Cells/Live cells/CD45+/CD3+,NK1.1-/CD4+ | Freq. of Parent	Lymphocytes-2/Single Cells/Single Cells/Live cells/CD45+/CD3+,NK1.1-/CD4+/CD4+, FoxP3+ | Freq. of Parent	Lymphocytes-2/Single Cells/Single Cells/Live cells/CD45+/CD3+,NK1.1-/CD8+ | Freq. of Parent	Lymphocytes-2/Single Cells/Single Cells/Live cells/CD45+/CD3+,NK1.1-/CD8+/GranB+ | Freq. of Parent	Lymphocytes-2/Single Cells/Single Cells/Live cells/CD45+/CD3+,NK1.1-/CD8+/Ki67+ | Freq. of Parent	Lymphocytes-2/Single Cells/Single Cells/Live cells/CD45+/CD3-, NK1.1+ | Freq. of Parent	Lymphocytes-2/Single Cells/Single Cells/Live cells/CD45+/CD3+,NK1.1-/CD8+/PD-1+ | Freq. of Parent	Lymphocytes-2/Single Cells/Single Cells/Live cells/CD45+/CD3+,NK1.1-/CD8+/PD-1+/PD1+, OVA+ | Freq. of Parent
sagA KO	5L.fcs	6310000	28.4		2	9.54	44.6	13.8	47.6	4.29	24.5	4.58	29.1	5.75
	5LL.fcs	6130000	41.3		2.02	7.96	41.8	22.8	43.4	2.97	34.6	3.27	27.2	3.13
	5R.fcs	2620000	71		1.88	15.3	29.5	41.9	59.6	23.3	65.7	14.2	75	0.14
	5RR.fcs	2970000	77.2		1.48	22.8	42	19.4	50	2.36	28.5	4.16	20.3	0.5
	6L.fcs	5840000	75.1		2.1	14.6	31.9	37.4	58.9	21.8	66.6	7.75	71.2	0.47
	6LL.fcs	1400000	62.1		0.87	6.78	51.4	35.6	40.8	7.04	49.2	3.14	53.1	0.47
	6R.fcs	878000	78.3		2.54	12	37.1	44.7	51.8	8.76	63.4	10.7	58.7	0.029
WT	9L.fcs	856000	94		1.17	32.5	14.4	55.4	80.4	79.8	92.3	9.83	90.9	2.29
	9LLR.fcs	5340000	38.7		0.97	6.78	38	28.3	53.5	12.5	62.8	5.33	56.4	0.24
	9RR.fcs	4730000	87.2		1.98	33.3	29.3	24.2	65.2	56.6	66.3	8.68	60.8	11.1
	10L.fcs	181272	99.1		5.69	47.9	7.41	25.9	86.7	99	96.3	29.5	95.5	0.21
	10LL.fcs	15696	97.4		5.97	42.8	5.56	8.33	75.5	58.1	82.7	25.6	84.4	0.32
	10R.fcs	237320	98		5.4	41.7	8.31	25.3	86.1	86.7	91.5	29.6	90	0.23
	10RR.fcs	2890000	68.4		1.99	16.2	58.4	40.8	29.3	17.2	55.4	4	50.3	0.72
	fmo foxp3.fcs	578000	38.6		2.24	9.1	39.7	0	52.4	12.3	63	5.18	46.3	6.87
	fmo granzB.fcs	1000000	42.9		2.03	9.3	40.8	30.2	51.4	0.76	59	5.24	46.4	6.37
	fmo ki67.fcs	1000000	44.5		2.4	9.75	40.1	31	51.1	11.4	0.36	5.36	42.3	8.07
	fmo pd-1.fcs	1000000	48.1		0.23	0.37	0	0	93.2	5.62	74.2	6.07	2.81	0
	fmo tcrb.fcs	1000000	42.7		2.01	10.1	38.8	29.7	52.3	8.98	51.5	4.79	41	6.4
	fmo tet.fcs	1000000	46.6		0.17	0.26	10.9	35.7	77.3	17.2	77.8	6.54	17.2	0
	Mean	2380000	68.4		2.8	21.3	27.5	30.4	62.8	40.3	68.4	11.5	64.5	1.66
	SD	2200000	23		1.77	14.7	15.2	13.9	16.1	34	22.3	7.78	25	2.81
