# Supplementary material for: Secreted antigen A peptidoglycan hydrolase is essential for Enterococcus faecium cell separation and priming of immune checkpoint inhibitor therapy
Source: eLife. 2024 Jun 10;13:RP95297. doi: 10.7554/eLife.95297 (PMC11164530; doi:10.7554/eLife.95297)
Supplement: Figure 4—source data 1. [file elife-95297-fig4-data1.xlsx]

## Sheet: Figure 4b
Days post-injection	WT, Nod2+/-, αPD-1										WT, Nod2-/-, αPD-1
4	71.13	99.86	145.99	167.45	173.66	65.73	157.23	87.22	100.6	63.07	112.75	109.65	117.6	231	114.51	167.6
7	261.53	129.51	411.36	77.36	204.07	91.21	222.09	107.41	67.36	98.88	220.45	204.6	93.12	119.03	240.19	307.75
9	272.67	162.23	502.02	157.24	184.56	175.9	167.71	82.4	136.08	110.73	194.93	267.93	75.85	109.77	138.54	392.08
11	81.31	99.06	256.65	84.51	335.01	141.12	203.77	74.56	116.65	122.05	375.71	462.25	225.4	175.99	207.49	377.84
14	70.74	152.19	547.68	39.08	551	125.44	320.17	101.69	211.47	73.33	813.56	1184.13	222.16	232.53	462.55	789.96
16	40.19	145.01	443.94	33.32	775	100.18	586.6	59.16	97.54	82.37	1287.47	1465.53	254.24	362.37	884.36	733.54

## Sheet: Figure 4c
Days post-injection	αPD-L1							WT, αPD-L1								ΔsagA, αPD-L1
4	126.39	131.2	111.55	94.64	124.3	119.68	86.88	103.65	127.4	73.75	79.85	163.61	150.7	123.46	86.15	95.75	93.64	145.97	116.92	108.05	151.38	58.73	74.53
6	206.49	158.39	224.87	224.52	172.65	177.45	130.62	75.12	95.09	111.39	66.03	176.42	220.5	82.5	183.5	184.32	265.12	289.1	250.47	201.81	274.6	238.14	154.56
8	307.78	209.56	343	453.02	235.82	342.22	541.88	76.55	109.33	128.56	67.69	183.12	137.5	141.31	149.74	273.33	334.62	458.12	370.56	334.64	182.24	300.06	277.11
10	325.1	319.74	392	342.4	162	746.5	541.88	159.53	132.88	230.3	103.93	202.68	163.37	96.23	289	892.8	332.12	722.58	400.08	364.14	397.33	325.8	259.84
12	818.02	380.81	391.12	468.78	279.75	1022.66	532.16	201.39	151.42	243.68	109.51	213.41	184.5	97.54	490.39	1627.65	492.72	1021.93	486.14	539.78	464.96	636.82	254.8

## Sheet: Figure 4d
	WT						ΔsagA						H2O
	62000000	36000000	78000000	40400000	520000000	1800000000	520000000	400000000	280000000	360000000	148000000	80000000	1	1	1	1	1	1

## Sheet: Figure 4e
	WT							ΔsagA
	2.39014e+06	1.37056e+06	5.19635e+06	2.40132e+07	90242.5	8.24007e+06	3290000	1.48813e+06	912506	4.93839e+06	4.52522e+06	2.58788e+06	1.11048e+06	2.6822e+06

## Sheet: Figure 4f
	WT							ΔsagA
	55.4	28.3	24.2	25.9	8.33	25.3	40.8	13.8	22.8	41.9	19.4	37.4	35.6	44.7

## Sheet: Figure 4g
	WT							ΔsagA
	80.4	53.5	65.2	86.7	75.5	86.1	29.3	47.6	43.4	59.6	50	58.9	40.8	51.8

## Sheet: Figure 4h
	WT							ΔsagA
	79.8	12.5	56.6	99	58.1	86.7	17.2	4.29	2.97	23.3	2.36	21.8	7.04	8.76

## Sheet: Figure 4i
	WT							ΔsagA
	92.3	62.8	66.3	96.3	82.7	91.5	55.4	24.5	34.6	65.7	28.5	66.6	49.2	63.4

## Sheet: Figure 4j
	WT							ΔsagA
	90.9	56.4	60.8	95.5	84.4	90	50.3	29.1	27.2	75	20.3	71.2	53.1	58.7
